# Supplementary material for: Use of tabletop exercises for healthcare education: a scoping review protocol
Source: PubMed Central journal article supplement — BMJ Open. 2020 Jan 7;10(1):e032662. doi: 10.1136/bmjopen-2019-032662 (PMC6955537; doi:10.1136/bmjopen-2019-032662), 2020-01-07
Supplement: bmjopen-2019-032662.draft_revisions.pdf [file bmjopen-2019-032662.draft_revisions.pdf]

# BMJ Open

BMJ Open is committed to open peer review. As part of this commitment we make the peer review history of every article we publish publicly available.

When an article is published we post the peer reviewers' comments and the authors' responses online. We also post the versions of the paper that were used during peer review. These are the versions that the peer review comments apply to.

The versions of the paper that follow are the versions that were submitted during the peer review process. They are not the versions of record or the final published versions. They should not be cited or distributed as the published version of this manuscript.

BMJ Open is an open access journal and the full, final, typeset and author-corrected version of record of the manuscript is available on our site with no access controls, subscription charges or pay-per-view fees (<http://bmjopen.bmj.com>).

If you have any questions on BMJ Open's open peer review process please email [editorial.bmjopen@bmj.com](mailto:editorial.bmjopen@bmj.com)

# BMJ Open

## Utility of tabletop exercises in healthcare education: a scoping review protocol

|                               |                                                                                                                                                                                                                                                                                                                                                                                                                                                                                                                                                                                                                                                                                                                                                                                                                                                            |
|-------------------------------|------------------------------------------------------------------------------------------------------------------------------------------------------------------------------------------------------------------------------------------------------------------------------------------------------------------------------------------------------------------------------------------------------------------------------------------------------------------------------------------------------------------------------------------------------------------------------------------------------------------------------------------------------------------------------------------------------------------------------------------------------------------------------------------------------------------------------------------------------------|
| Journal:                      | <i>BMJ Open</i>                                                                                                                                                                                                                                                                                                                                                                                                                                                                                                                                                                                                                                                                                                                                                                                                                                            |
| Manuscript ID                 | bmjopen-2019-032662                                                                                                                                                                                                                                                                                                                                                                                                                                                                                                                                                                                                                                                                                                                                                                                                                                        |
| Article Type:                 | Protocol                                                                                                                                                                                                                                                                                                                                                                                                                                                                                                                                                                                                                                                                                                                                                                                                                                                   |
| Date Submitted by the Author: | 30-Jun-2019                                                                                                                                                                                                                                                                                                                                                                                                                                                                                                                                                                                                                                                                                                                                                                                                                                                |
| Complete List of Authors:     | Frégeau, Amélie; Hôpital du Sacré-Coeur de Montréal, Emergency medicine<br>Cournoyer, Alexis; Université de Montréal Faculté de médecine, ; Hôpital du Sacré-Coeur de Montréal, Department of Emergency Medicine<br>Maheu-Cadotte, Marc-André; Institut De Cardiologie de Montréal, ; Université de Montréal, Faculty of Nursing<br>Soucy, Nathalie; Centre Hospitalier de L'Université de Montréal, Direction of Education and of CHUM Academy<br>St-Cyr Bourque, Julie; Centre Hospitalier de L'Université de Montréal, Emergency medicine department<br>Cossette, Sylvie ; Montreal Heart Institute Research Centre, Research and International development<br>Castonguay, Véronique; Hôpital du Sacré-Coeur de Montréal, Emergency medicine department<br>Fleet, Richard; Université Laval, Département de médecine familiale et de médecine d'urgence |
| Keywords:                     | MEDICAL EDUCATION & TRAINING, ACCIDENT & EMERGENCY MEDICINE, HEALTH SERVICES ADMINISTRATION & MANAGEMENT, INTENSIVE & CRITICAL CARE, PRIMARY CARE, QUALITATIVE RESEARCH                                                                                                                                                                                                                                                                                                                                                                                                                                                                                                                                                                                                                                                                                    |
|                               |                                                                                                                                                                                                                                                                                                                                                                                                                                                                                                                                                                                                                                                                                                                                                                                                                                                            |

SCHOLARONE™  
Manuscripts

## Utility of tabletop exercises in healthcare education: a scoping review protocol

Amélie Frégeau, Alexis Cournoyer, Marc-André Maheu-Cadotte, Nathalie Soucy, Julie St-Cyr Bourque, Sylvie Cossette, Véronique Castonguay and Richard Fleet

Amélie Frégeau

Master student in clinical sciences and education, Faculty of Health Sciences, Université Laval, Québec, Canada

Senior resident in specialised emergency medicine, Université de Montréal, Montreal, Canada

Alexis Cournoyer

Doctoral student, Faculty of Medicine, Université de Montréal, Montreal, Canada

Emergency physician, Hôpital du Sacré-Cœur de Montréal, Montreal, Canada

Researcher, Hôpital du Sacré-Coeur de Montréal, Montreal, Canada

Marc-André Maheu-Cadotte

Doctoral student, Faculty of Nursing, Université de Montréal, Montreal, Canada

Doctoral student, Montreal Heart Institute Research Centre, Montreal, Canada

Doctoral student, Centre de recherche du Centre hospitalier de l'Université de Montréal, Montreal, Canada

Nathalie Soucy

PhD psychology, Université Laval, Quebec, Canada

Education consultant, Centre hospitalier de l'Université de Montréal, Montreal, Canada

Julie St-Cyr Bourque

Professor, Université de Montréal, Montreal, Canada

Emergency physician, Centre hospitalier de l'Université de Montréal, Montreal, Canada

Sylvie Cossette

Full professor, Faculty of Nursing, Université de Montréal, Montreal, Canada

Researcher, Montreal Heart Institute Research Centre, Montreal, Canada

Véronique Castonguay

Master in education, Université de Montréal, Montreal, Canada

Professor and leader of the educational centre of Université de Montréal, Montreal, Canada

Emergency physician, Hôpital du Sacré-Cœur de Montréal, Montreal, Canada

Richard Fleet

PhD clinical sciences, Université Laval, Quebec, Canada

Financed researcher from Fonds de recherche du Québec en santé (FRQS), Université Laval, Quebec, Canada

Full professor, Faculty of Medicine, Université Laval, Quebec, Canada

1  
2  
3 Emergency physician, Hôpital Hôtel-Dieu de Lévis, Quebec, Canada  
4 Psychologist, Quebec, Canada  
5

6 Correspondence to:

7 Amélie Frégeau

8 [amelie.fregeau@umontreal.ca](mailto:amelie.fregeau@umontreal.ca)

9 514-338-2222, ext. 3234

10 Fax: 514-228-3513

11 Hôpital du Sacré-Coeur de Montréal

12 5400 Boulevard Gouin Ouest, Door Z-1145

13 H4J 1C5

14 Montréal (Quebec)

15 Canada  
16  
17  
18

19 Word count: 2869  
20  
21  
22  
23  
24  
25  
26  
27  
28  
29  
30  
31  
32  
33  
34  
35  
36  
37  
38  
39  
40  
41  
42  
43  
44  
45  
46  
47  
48  
49  
50  
51  
52  
53  
54  
55  
56  
57  
58  
59  
60

## ABSTRACT

**Introduction:** The later increase in the occurrence of worldwide disasters such as wars, natural disasters, or even biological disasters have potentiated the risk of emergency departments (EDs) to face a mass-casualty incident (MCI) where the EDs would be overcrowded. This raise concerns worldwide as safe and timely access to definitive care is dependent on an optimized patient flow. Hence, this international context urged the need to develop educational initiatives in healthcare to optimize disaster management and patient flow through health facilities. Tabletop exercises (TTX) were proposed as an educational educative fulfilling the aforementioned objectives. The aim of this scoping review is to synthesize evidence from the published literature on the utility of tabletop exercises in healthcare settings. The findings of this review will inform future efforts to incorporate tabletop exercises into the training of healthcare professionals.

**Methods and analysis:** A broad search of the literature will be conducted using a combination of MeSH terms and keywords in PubMed, MEDLINE, EBM Reviews, CINAHL, EMBASE, and ERIC, along with a search of the grey literature using various online platforms. Studies reporting on the use of tabletop exercises in healthcare will be included. Two reviewers will independently perform article screening and data extraction. To review disparate data systematically, the quality of included articles will be assessed by two reviewers using the validated checklist developed by Hawker and colleagues, as well as the JBI Critical Appraisal Checklist for Text and Opinion Papers. Data will be synthesized quantitatively using descriptive statistics and qualitatively through a narrative summary.

**Ethics and dissemination:** As this scoping review will examine previously collected data, no Institutional Review Board approval is required. Study results will be submitted to an appropriate peer-reviewed journal.

**Keywords:** medical education, tabletop exercises, TTX, healthcare, disaster medicine, training, simulation

## STRENGTHS AND LIMITATIONS OF THIS STUDY

- The results of this scoping review will provide a quantitative and narrative synthesis of evidence for the application of tabletop exercises as a teaching tool in healthcare – a timely and important topic for training in the fields of disaster medicine and non-disaster medicine.
- This study has a rigorous methodology that is reported according to the Preferred Reporting Items for Systematic Review and Meta-Analyses extension for Scoping Reviews (PRISMA-ScR) Checklist and the scoping methodological framework developed by Arksey and O'Malley.
- A formal quality assessment of included studies will be conducted using a checklist developed by Hawker and colleagues, as well as the JBI Critical Appraisal Checklist for Text and Opinion Papers.
- A limitation of this study is the potential to miss relevant articles as the search will be limited to publications in English or French; however, a preliminary search suggests a negligible number of relevant articles have been published in another language.

## INTRODUCTION

In the past decade, the occurrence of worldwide disasters such as wars, natural disasters, or even biological disasters have increased.[1] As disaster incidents are generally associated with the surge of multiple injured victims, the healthcare system can be quickly overwhelmed by a lack of human and material resources. This is commonly called a mass-casualty incident (MCI). As the initial point of access to the healthcare system for the majority of injured patient, the emergency department (ED) becomes rapidly overcrowded in the event of an MCI. Overcrowding in the ED can be defined as “a situation where the demand for emergency services exceeds the ability of an ED to provide quality care within appropriate time frames”. [2] Delays to definitive care are a serious threat to patient safety, and have been associated with increased mortality and poor outcomes.[3] One strategy for improving patient outcomes is to educate emergency physicians and staff on how to optimally manage patient flow in their ED.[4-10]

As such, there is actually a growing interest in developing educational interventions to teach and reinforce disaster management and planning in healthcare to improve patient flow.[11-14] One of the proposed training methods is tabletop exercises (TTX), which have gained popularity because of their lower cost compared to disaster drills. A tabletop exercise is essentially a meeting to discuss a simulated emergency or disaster; these exercises are used to evaluate the preparedness of an organization and to educate participants on their roles during the response. The exercise can take the form of a discussion-based activity that is guided by a facilitator and involves a dialogue on the steps to take in response to a hypothetical emergency scenario. Tabletop exercises can also take the form of a board game where the board depicts a disaster scene or a healthcare setting and the participants play as their own role in real life and move around symbol units (also called “movable markers”) which represent healthcare professionals, patients and available resources.[15] Symbol units that represent patients usually show visible injuries on the front and physical exam results and clinical evaluations on the back. Under the guidance of an instructor, participants move their markers around the board to accomplish their duties as they would in real life. Using tabletop exercises as a simulation tool, hospital administrators can assess whether professional roles and responsibilities throughout the

1  
2  
3 response system are well understood and accomplished promptly to optimize patient  
4 flow.[16]

5  
6 Although two previous reviews of emergency preparedness activities have included  
7 tabletop exercises among other types of training exercises,[17,18] there has not been a  
8 review to date that systematically and specifically evaluates the utility of tabletop exercises  
9 in the healthcare setting. As tabletop exercises are gaining popularity worldwide,  
10 performing an overview of the current state of literature on these activities will help better  
11 understand their benefits and limitations in the various healthcare contexts where they are  
12 being used. The purpose of this scoping review is to map the nature and extent of studies  
13 that have investigated the utility of tabletop exercises in healthcare education. The findings  
14 of this review will guide future research in this area and inform clinician educators and  
15 administrators who are considering or developing tabletop exercises to improve work flows  
16 at their local institutions.  
17  
18  
19  
20  
21  
22  
23  
24  
25  
26  
27

## 28 **METHODS**

29  
30 The protocol for this scoping review is based on Arksey & O'Malley's five-stage  
31 methodological framework statement and reported according to the Preferred Reporting  
32 Items for Systematic Review and Meta-Analyses extension for Scoping Reviews  
33 (PRISMA-ScR) Checklist.[19-21]  
34  
35  
36  
37

### 38 **Stage 1: Identifying the research question**

39  
40 As this scoping review aims to assess the utility of tabletop exercises in healthcare  
41 settings, we will address the following research questions:  
42  
43

- 44 • To date, what educational interventions in a healthcare setting have involved  
45 tabletop exercises?
    - 46 ○ What were the contexts, settings, theoretical frameworks, program types  
47 (stand-alone intervention or part of multi-component intervention), duration  
48 and frequency of these interventions?
    - 49 ○ What were the study designs?
    - 50 ○ Who were the participants?
    - 51 ○ Who were the instructors?
- 52  
53  
54  
55  
56  
57  
58  
59  
60



- What were the interventions (details of the tabletop exercise) and what were the comparators (if applicable)?
- What were the outcomes evaluated and the study findings?

As previously mentioned, the primary objective of this study is to synthesize evidence on the utility of tabletop exercises in healthcare settings. In addition, we will report the outcomes of each included study according to the Kirkpatrick Model of outcomes of educational programs.[22] This model determines aptitude from training and educational programs based on four levels of criteria: reaction, learning, behaviour, and organizational results. Thus, as a secondary objective, the following research question will be addressed:

- What were the outcomes of studies that investigated the use of tabletop exercises in healthcare settings according to the Kirkpatrick Model of outcomes of educational programs?

The four levels of the Kirkpatrick Model are described below:

- The first level is “Reaction”. This level aims to measure the immediate perception and attitude of the learner to the intervention. This does not predict what has been learned, nor which information will be transferred into the future practice of the learner.
- The second level is “Learning”. This level aims to measure what has been learned during the pedagogical intervention (e.g., by comparing results of a pre-test and post-test).
- The third level is “Behaviour”. This level aims to measure if the learner applies the new knowledge in their daily life (e.g., by direct observation of the learner or by a test in their work environment).
- The fourth level is “Results”. This level aims to measure the organizational impact of daily use of the new knowledge by the learner (e.g., by analyzing changes in morbidity and mortality statistics, or in the patient flow statistics of a unit following training).

Generally, building an educational intervention that addresses higher levels of the Kirkpatrick Model and measures higher-level outcomes is more complete than building one that only addresses the lower levels.[22]

## Stage 2: Identifying relevant studies

Eligible studies, abstracts and conference summaries will be identified through a comprehensive search of CINAHL, Embase, EBM Reviews, ERIC, MEDLINE, and PubMed, while the grey literature will be searched using various online platforms (see Supplementary Material I). For practical reasons, searches will be limited to articles in English and French. There will be no limit on publication date in order to generate as broad a picture as possible of educational interventions in healthcare using tabletop exercises.

The search strategy was collaboratively and iteratively developed with the assistance of a librarian. We were unable to identify a medical subject heading (MeSH) that was specific for tabletop exercises. Hence, we developed a search strategy for PubMed using keywords related to the following concepts: tabletop exercises, whiteboards with magnetic symbols, simulation, training and serious games. Open and closed vocabulary were used to determine the best possible strategy. The search strategy was adapted to search the other online databases, and similar keywords were used to search the grey literature.

## Stage 3: Study selection

### Inclusion and exclusion criteria

The eligibility of articles will be assessed based on the following inclusion criteria:

- The population of interest is healthcare professionals, including students in a healthcare program.
- Academic and clinical settings where healthcare is provided or taught (e.g., university, hospital, clinics) will be considered.
- Studies assessing a tabletop exercise as a stand-alone intervention or as part of a multi-component intervention (e.g., combined with a workshop or a classroom-based learning activity) will be considered.
- To be included, articles must report on at least one learning outcome from the Kirkpatrick Model (as previously described).
- All types of study designs (e.g., qualitative designs, quantitative designs and mixed methods designs) and methodologies including commentaries, case studies, descriptions of pedagogical innovations, conference summaries and

viewpoint articles will be considered for inclusion. Scoping review and systematic review articles will not be considered for inclusion.

- Publication languages will be limited to English and French.

#### Selection process

EndNote software (Version X9, Clarivate Analytics) will be used to import, manage, categorize and upload all collected references during the screening and selection process. If we are unable to obtain the full text of an article, we will contact the corresponding author for the article in question; failure to respond will result in study exclusion. The reference lists of all included studies will be screened to search for any additional relevant studies.

Two reviewers (AF, AC) will meet to discuss the criteria for inclusion, and will then independently screen the titles and abstracts.

Following the initial selection process, the full text of articles that are potentially relevant will be screened for eligibility by two reviewers (AF, MAMC). Any disagreements regarding study inclusion will be resolved through consensus. If consensus cannot be reached, a third reviewer (AC) will be consulted to resolve the disagreement. Reasons for excluding references at the full-text assessment stage of the screening process will be documented and reported in a PRISMA flow diagram.[20] The reviewers will meet again following full-text assessment to discuss any challenges and uncertainties related to study selection.

#### **Stage 4: Charting the data**

Two reviewers (AF, MAMC) will independently perform data extraction from studies included in the review. The research team has adapted a standardized charting form that was inspired by a protocol published by Shen et al.,[23] which was based on a similar research question that was applied to a different subject. This form was judged by members of our research team to be easy to use and relevant to our aims. The data charting domains and subdomains are described in Table 1. Reviewers will pilot the charting form on five to ten studies to determine whether this approach to data extraction is consistent with the research question and study purpose. Any relevant data that is not captured during the

initial data extraction phase will be added iteratively by adapting the chart. If there is unclear or missing data in an article, we will contact the corresponding author to obtain clarification or additional data.

Although an assessment of study quality is not mandatory for a scoping review, it is strongly recommended by Arksey & O'Malley's five-stage methodological framework statement.[21] We will assess the quality of included studies to describe

**Table 1: Data charting domains and description of subdomains**

| Domain/subdomains          | Description                                                                                                      |
|----------------------------|------------------------------------------------------------------------------------------------------------------|
| <b>Article details</b>     |                                                                                                                  |
| Author                     | Last name and initials of the first author                                                                       |
| Year                       | Publication year of the article                                                                                  |
| Country                    | Country where the study was performed                                                                            |
| <b>Initiative details</b>  |                                                                                                                  |
| Context                    | What was the need to organize a tabletop exercise?                                                               |
| Setting                    | Where did the educational intervention take place (e.g., community, hospital, university)?                       |
| Theoretical framework      | What was the theoretical framework? (if available)                                                               |
| Program delivery           | How was the program delivered (e.g., seminar, lecture, course, in-service training)?                             |
| Instructors                | Who were the facilitators/instructors?                                                                           |
| Program length             | How long did the program/intervention last?                                                                      |
| <b>Study details</b>       |                                                                                                                  |
| Study design               | What was the study design?                                                                                       |
| Participants               | Who were the study participants? What was the sample size?                                                       |
| Intervention               | What was the intervention? Will report as described by the study authors                                         |
| Comparator                 | What was the comparator? (if applicable)                                                                         |
| Study outcomes             | What did the authors identify as the study outcomes?                                                             |
| Outcomes                   | What were the main results of the study?                                                                         |
| <b>Kirkpatrick's level</b> |                                                                                                                  |
| Reaction                   | Did the intervention measure the immediate perception and attitude of the learner regarding the intervention?    |
| Learning                   | Did the intervention measure what was learned during the pedagogical intervention?                               |
| Behaviour                  | Did the intervention measure if the learner applied the new knowledge in their daily life?                       |
| Results                    | Did the intervention measure the organizational impact of daily use of the new knowledge at work by the learner? |
| <b>Risk of bias</b>        |                                                                                                                  |
| Hawker checklist           | What is the score of the study? (if original study)                                                              |
| JBI checklist              | What is the score of the study? (if editorial, opinion, or comment)                                              |

more precisely the current evidence on tabletop exercises in healthcare and to formulate future-oriented recommendations that address methodological gaps identified in the

1  
2  
3 literature. For original studies, study quality will be independently assessed by two  
4 reviewers (AF, MAMC) according to the checklist developed Hawker et al. (see  
5 Supplementary Material II).[24] This tool was chosen because it has been validated to  
6 systematically review disparate data, whether qualitative or quantitative. For editorials,  
7 opinion texts and comments, we will assess quality using the validated JBI Critical  
8 Appraisal Checklist for Text and Opinion Papers (see Supplementary Material III).[25]  
9  
10  
11  
12  
13  
14  
15  
16

### 17 **Stage 5: Collating, summarizing and reporting the results**

18  
19 We will synthesize and report data on study characteristics and outcomes including  
20 the lead author, publication year, country, study context, setting, design, theoretical  
21 framework, program delivery, program duration, participants, instructors, intervention,  
22 comparator (if applicable), and the outcomes. Moreover, for each study we will classify  
23 the outcomes using the Kirkpatrick Model of outcomes of educational programs (possible  
24 levels include reaction, learning, behaviour, and results).[22] We will report on all levels  
25 of Kirkpatrick's Model, with special inquiry into the level that is most frequently measured  
26 among the studies included in the review. Finally, results of the quality assessment will be  
27 reported using the checklist developed by Hawker et al. for each original study, and using  
28 the JBI Critical Appraisal Checklist for Text and Opinion Papers for any editorials, opinion  
29 texts or comments included in the review.[24,25]  
30  
31  
32  
33  
34  
35  
36  
37

38 In addition, studies measuring the same outcome through the same type of  
39 population (e.g. nurses in training, emergency medicine residents, etc.) will be grouped. A  
40 narrative review to extract contextual information from each study or group of studies will  
41 be performed. Where applicable, a qualitative deductive thematic analysis of common  
42 outcomes following Kirkpatrick's framework will be performed.  
43  
44  
45  
46  
47  
48

### 49 **ETHICS AND DISSEMINATION**

50  
51 As this will be a scoping review of previously published studies, no ethics approval  
52 is required. The study findings will be submitted to an appropriate peer-reviewed journal.  
53  
54  
55  
56  
57  
58  
59  
60

## DISCUSSION

This scoping review will fill an important gap in the literature, as there are no existing reviews that exclusively focused on the use of tabletop exercises in healthcare settings. The protocol of this scoping review was developed in accordance with the PRISMA-ScR Checklist and Arksey & O'Malley's five-stage methodological framework.[19-21] An extensive quality assessment of included studies will be performed in an effort to substantiate and strengthen any conclusions that are drawn.

Our search strategy was developed collaboratively with the assistance of a trained librarian, and will be used to search several relevant databases as well as the grey literature. Since we have limited this review to articles published in English or French, there is the possibility that our search will miss relevant articles that were published in another language. However, the results of a preliminary search by our group to identify articles examining the use of tabletop exercises in healthcare suggest that few (if any) studies on this topic have been published in another language. Furthermore, we will carefully search the reference lists of included articles in order to identify any relevant articles that may have been missed by the search strategy.

The results of this study will inform researchers, educators, clinicians, and administrators on the utility of tabletop exercises in a healthcare environment. Moreover, it will identify gaps in the literature regarding the application of tabletop exercises in healthcare. These findings will be used to help develop and implement future educational programs involving tabletop exercises, with the hope that enhanced training of healthcare professionals will ultimately lead to improvements in patient satisfaction, security and outcomes.

## AUTHOR CONTRIBUTIONS

All authors contributed to the conception of the protocol. AF wrote the initial draft of the protocol. AC, MAMC, SC, VC, NS, JSCB and RF critically revised the initial draft for important intellectual content. All authors have approved the final version of this submitted manuscript and agree to be accountable for all aspects related to this work.

## ACKNOWLEDGEMENTS

This research was carried out as part of the master's studies of the first author and for which she received scholarships from the followings: Centre de recherche sur les soins et les services de première ligne de l'Université Laval from Université Laval and Chaire Docteur Sadok Besrouer from Université de Montréal.

The authors would like to thank Ms. Daniela Ziegler for helping with the design of the research methodology and Percipient Research & Consulting for their assistance with language editing.

## DATA SHARING

No additional data available.

## COPYRIGHT

The Corresponding Author has the right to grant on behalf of all authors and does grant on behalf of all authors, a worldwide licence to the Publishers and its licensees in perpetuity, in all forms, formats and media (whether known now or created in the future), to i) publish, reproduce, distribute, display and store the Contribution, ii) translate the Contribution into other languages, create adaptations, reprints, include within collections and create summaries, extracts and/or, abstracts of the Contribution, iii) create any other derivative work(s) based on the Contribution, iv) to exploit all subsidiary rights in the Contribution, v) the inclusion of electronic links from the Contribution to third party material where-ever it may be located; and, vi) licence any third party to do any or all of the above.

## COMPETING INTERESTS

All authors declare no support from any organization for the submitted work, no financial relationships with any organizations that might have an interest in the submitted work in the previous three years, and no other relationships or activities that could appear to have influenced the submitted work.

## TRANSPARENCY DECLARATION

The lead author (the manuscript's guarantor) affirms that the manuscript is an honest, accurate, and transparent account of the study being reported, that no important aspects of the study have been omitted, and that any discrepancies from the study as planned (and, if relevant, registered) have been explained.

## FUNDING

This work was supported by a \$2500 grant for research in primary care from Chaire Docteur Sadok Besrouer de l'Université de Montréal and a \$5000 grant for research in primary care from Centre de recherche sur les soins et les services de première ligne de l'Université Laval (CERSSPL-UL) and the Centre universitaire intégré de soins et de services de première ligne (CIUSSS) de la Capitale-Nationale.



## REFERENCES

1. International Federation of Red Cross and Red Crescent Societies. Leaving no one behind: The international humanitarian sector must do more to respond to the needs of the world's most vulnerable people. *World Disasters Report 2018*:225-8.
2. Affleck A, Parks P, Drummond A, Rowe BH, Ovens HJ. CAEP Position Statement: Emergency department overcrowding and access block. *CJEM* 2013;15:359-70.
3. Singer A, Thode H, Viccellio P, Pines J. The association between length of emergency department boarding and mortality. *Society of Academic Emergency Medicine* 2011;18:1324-9.
4. Sánchez M, Suárez M, Asenjo M, Bragulat E. Improvement of emergency department patient flow using lean thinking. *Int J Qual Health Care* 2018;30:250-6.
5. Rutman L, Stone K, Reid J, Woodward GA, Migita R. Improving patient flow using lean methodology: an emergency medicine experience. *Curr Treat Options Peds* 2015;1:359-71.
6. Spaite DW, Bartholomeaux F, Guisto J, et al. Rapid process redesign in a university-based emergency department: decreasing waiting time intervals and improving patient satisfaction. *Ann Emerg Med* 2002;39:168-77.
7. Potts L, Ryan C, Diegel-Vacek L, Murchek A. Improving patient flow from the emergency department utilizing a standardized electronic nursing handoff process. *J Nurs Adm* 2018;48:432-6.
8. Love RA, Murphy JA, Lietz TE, Jordan KS, et al. The effectiveness of a provider in triage in the emergency department: a quality improvement initiative to improve patient flow. *Adv Emerg Nurs J* 2012;34:65-74.
9. Van Dyke KJ, McHugh M, Yonek J, Moss D, et al. Facilitators and barriers to the implementation of patient flow improvement strategies. *Qual Manag Health Care* 2011;20:223-33.
10. Kerner RL Jr, Gallo K, Cassara M, D'Angelo J, Egan A, Simmons JG. Simulation for operational readiness in a new freestanding emergency department: strategy and tactics. *Simul Healthc* 2016;11:345-56.
11. Linskens EJ, Neu AE, Walz EJ, et al. Preparing for a foreign animal disease outbreak using a novel tabletop exercise. *Prehosp Disaster Med* 2018;33:640-6.

12. Chung S, Gardner AH, Schonfeld DJ, et al. Addressing children's needs in disasters: a regional pediatric tabletop exercise. *Disaster Med Public Health Prep* 2018;12(5):582-6.
13. Wexler B, Flamm A. Lessons learned from an active shooter full-scale functional exercise in a newly constructed emergency department. *Disaster Med Public Health Prep* 2017;11:522-5.
14. Savoia E, Biddinger PD, Fox P, Levin DE, Stone L, Stoto MA. Impact of tabletop exercises on participants' knowledge of and confidence in legal authorities for infectious disease emergencies. *Disaster Med Public Health Prep* 2009;3:104-10.
15. Evans C, Schwartz R. Using tabletop exercises as an innovative and practical teaching strategy in response to external disaster scenarios. *Nursing education perspectives* 2019;40:62-4.
16. Mackenzie C, Donohue J, Wasylina P, Cullum W, Hu P, Lam DM. How will military/civilian coordination work for reception of mass casualties from overseas? *Prehosp Disaster Med* 2009;24:380-8.
17. Hsu EB, Jenckes MW, Catlett CL, et al. Effectiveness of hospital staff mass-casualty incident training methods: a systematic literature review. *Prehosp Disaster Med* 2004;19:191-9.
18. Skryabina E, Reedy G, Amlôta R, Jaye P, Riley P. What is the value of health emergency preparedness exercises? A scoping review study. *Int J Disaster Risk Reduct* 2017;21:274-83.
19. Tricco AC, Lillie E, Zarin W, et al. PRISMA extension for scoping reviews (PRISMA-ScR): checklist and explanation. *Ann Intern Med* 2018;169:467-73.
20. Moher D, Liberati A, Tetzlaff J, et al. Preferred reporting items for systematic reviews and meta-analyses: the PRISMA statement. *BMJ* 2009;339:b2535.
21. Arksey H, O'Malley L. Scoping studies: towards a methodological framework. *Int J Soc Res Methodol* 2005;8:19-32.
22. Kirkpatrick DL, Kirkpatrick JD. *Evaluating Training Programs*, 3rd ed. San Francisco, CA: Berrett-Koehler Publishers, 2006.
23. Shen N, Sockalingam S, Abi Jaoude A, et al. Scoping review protocol: education initiatives for medical psychiatry collaborative care. *BMJ Open* 2017;7:e015886.

- 1  
2  
3 24. Hawker S, Payne S, Kerr C, Hardey M, Powell J. Appraising the evidence: reviewing  
4 disparate data systematically. *Qual Health Res* 2002;12:1284-99.  
5  
6 25. Aromataris E, Munn Z. Joanna Briggs Institute Reviewer's Manual. The Joanna Briggs  
7 Institute. 2017. Available from <https://reviewersmanual.joannabriggs.org/>  
8  
9  
10  
11  
12  
13  
14  
15  
16  
17  
18  
19  
20  
21  
22  
23  
24  
25  
26  
27  
28  
29  
30  
31  
32  
33  
34  
35  
36  
37  
38  
39  
40  
41  
42  
43  
44  
45  
46  
47  
48  
49  
50  
51  
52  
53  
54  
55  
56  
57  
58  
59  
60

For peer review only

## SUPPLEMENTARY MATERIAL I – SEARCH STRATEGY

### PubMed

| <b><u>Database</u></b> |                             |
|------------------------|-----------------------------|
| Database               | MEDLINE                     |
| Interface              | PubMed                      |
| Search date            | 24 <sup>th</sup> July, 2018 |
| Filters                | -                           |

| <b><u>Syntax</u></b> |                         |
|----------------------|-------------------------|
| [MeSH Terms]         | Medical Subject Heading |
| OR, AND              | Boolean operators       |
| *                    | Truncation              |
| [tw]                 | Text word               |

| <b><u>Search strategy</u></b> |
|-------------------------------|
|-------------------------------|

emergo[tw] OR "train simulation"[tw] OR "table simulation"[tw] OR macsim[tw] OR "ETS simulation"[tw] OR ETS instructor\*[tw] OR "train simulations"[tw] OR "table simulations"[tw] OR "ETS simulations"[tw] OR "Distributed Cognition for Teamwork"[tw] OR Train System[tw] OR DigEmergo[tw] OR ISEE Hospital[tw] OR DigEmergo[tw] OR simulation game\*[tw] OR tabletop exercise\*[tw]

OR

((Whiteboard[tiab] OR adhesive label\*[tiab] OR movable marker\*[tiab] OR "magnetic symbol"[tiab] OR "magnetic symbols"[tiab] OR scenario-based[tiab])

AND

(train\*[tiab] OR simulation\*[tiab] OR prepare\*[tiab] OR educational[tiab] OR serious games[tiab]))

AND

emergency

Total references: 524

## MEDLINE

| <b><u>Database</u></b> |                                                                                                                                 |
|------------------------|---------------------------------------------------------------------------------------------------------------------------------|
| Database               | Ovid MEDLINE(R) and Epub Ahead of Print, In-Process & Other Non-Indexed Citations, Daily, and Versions(R) 1946 to July 24, 2018 |
| Interface              | OvidSP                                                                                                                          |
| Research date          | 25 <sup>th</sup> July, 2018                                                                                                     |
| Filters                | None                                                                                                                            |

| <b><u>Syntax</u></b> |                                                                  |
|----------------------|------------------------------------------------------------------|
| /                    | Exact Subject Heading                                            |
| */                   | Focus on Exact Subject Heading                                   |
| tw                   | Text word field in MEDLINE includes Title (TI) and Abstract (AB) |
| kw                   | Keywords                                                         |
| or, and              | Boolean operators                                                |
| adj2                 | The Adjacent operator                                            |
| *                    | Truncation                                                       |

### **Search strategy**

- 1 (emergo or maccsim or ETS instructor\* or "ETS simulation" or "Distributed Cognition for Teamwork" or DigEmergo).tw,kw. (14)
- 2 (train simulation\* or table simulation\* or Train System or ISEE Hospital or simulation game\* or tabletop exercise\*).tw,kw. (222)
- 3 1 or 2 (233)
- 4 (Whiteboard or adhesive label\* or movable marker\* or magnetic symbol\* or scenario-based).tw,kw. (1009)
- 5 (train\* or simulation\* or prepare\* or educational or serious game\*).tw,kw. (1221383)
- 6 4 and 5 (309)**
- 7 3 or 6 (540)**

## EBM Reviews

| <b><u>Database</u></b> |                                                                                                                                                                                                                                                                                                                                                                                                                                                                                                                                                       |
|------------------------|-------------------------------------------------------------------------------------------------------------------------------------------------------------------------------------------------------------------------------------------------------------------------------------------------------------------------------------------------------------------------------------------------------------------------------------------------------------------------------------------------------------------------------------------------------|
| Databases              | EBM Reviews - Cochrane Database of Systematic Reviews 2005 to July 18, 2018,<br>EBM Reviews - ACP Journal Club 1991 to June 2018,<br>EBM Reviews - Database of Abstracts of Reviews of Effects 1st Quarter 2016,<br>EBM Reviews - Cochrane Clinical Answers June 2018,<br>EBM Reviews - Cochrane Central Register of Controlled Trials June 2018,<br>EBM Reviews - Cochrane Methodology Register 3rd Quarter 2012,<br>EBM Reviews - Health Technology Assessment 4th Quarter 2016,<br>EBM Reviews - NHS Economic Evaluation Database 1st Quarter 2016 |
| Interface              | OvidSP                                                                                                                                                                                                                                                                                                                                                                                                                                                                                                                                                |
| Research date          | 25 <sup>th</sup> July, 2018                                                                                                                                                                                                                                                                                                                                                                                                                                                                                                                           |
| Filters                | None                                                                                                                                                                                                                                                                                                                                                                                                                                                                                                                                                  |

| <b><u>Syntax</u></b> |                       |
|----------------------|-----------------------|
| /                    | Exact Subject Heading |
| kw                   | Keywords              |
| af                   | All fields            |
| or, and              | Boolean operators     |
| *                    | Truncation            |
| adj2                 | The Adjacent operator |

### **Search strategy**

- 1 (emergo or maccsim or ETS instructor\* or "ETS simulation" or "Distributed Cognition for Teamwork" or DigEmergo).tw,kw. (0)
- 2 (train simulation\* or table simulation\* or Train System or ISEE Hospital or simulation game\* or tabletop exercise\*).tw,kw. (22)
- 3 1 or 2 (22)
- 4 (Whiteboard or adhesive label\* or movable marker\* or magnetic symbol\* or scenario-based).tw,kw. (82)
- 5 (train\* or simulation\* or prepare\* or educational or serious game\*).tw,kw. (97711)
- 6 4 and 5 (43)
- 7 3 or 6 (65)

## CINAHL

| <b><u>Database</u></b> |                 |
|------------------------|-----------------|
| Databases              | CINAHL Complete |
| Interface              | EBSCO           |
| Search date            | 25th July, 2018 |
| Filters                | None            |

| <b><u>Syntax</u></b> |                              |
|----------------------|------------------------------|
| MH                   | Exact Subject Headings       |
| MM                   | Exact Major Subject Headings |
| TI                   | Title                        |
| AB                   | Abstract                     |
| S (1, 2, 3...)       | Search                       |
| OR, AND              | Boolean operators            |

### **Search strategy**

| #  | Question                                                                                                                                              | Results |
|----|-------------------------------------------------------------------------------------------------------------------------------------------------------|---------|
| S1 | (emergo or macsim or ETS instructor* or "ETS simulation" or "Distributed Cognition for Teamwork" or DigEmergo)                                        | 8       |
| S2 | (train simulation* or table simulation* or Train System or ISEE Hospital or simulation game* or tabletop exercise*)                                   | 119     |
| S3 | ((Whiteboard or adhesive label* or movable marker* or magnetic symbol* or scenario-based)) AND ((train* or simulation* or prepare* or serious game*)) | 204     |
| S4 | S1 OR S2 OR S3                                                                                                                                        | 328     |

## Embase

| <b><u>Database</u></b> |                                                     |
|------------------------|-----------------------------------------------------|
| Database               | Database Field Guide Embase 1974 to 2018<br>July 23 |
| Interface              | OvidSP                                              |
| Research date          | 25 <sup>th</sup> July, 2018                         |
| Filters                | -                                                   |

| <b><u>Syntax</u></b> |                                                                                        |
|----------------------|----------------------------------------------------------------------------------------|
| /                    | Exact Subject Heading                                                                  |
| */                   | Focus on Exact Subject Heading                                                         |
| tw                   | Text word field in EMBASE includes Title (TI), Abstract (AB) and Drug Trade Name (TN). |
| kw                   | Keywords                                                                               |
| or, and              | Boolean operators                                                                      |
| adj2                 | The Adjacent operator                                                                  |
| *                    | Truncation                                                                             |

### **Search strategy**

- 1 (emergo or macsim or ETS instructor\* or "ETS simulation" or "Distributed Cognition for Teamwork" or DigEmergo).tw,kw. (16)
- 2 (train simulation\* or table simulation\* or Train System or ISEE Hospital or simulation game\* or tabletop exercise\*).tw,kw. (274)
- 3 1 or 2 (283)
- 4 (Whiteboard or adhesive label\* or movable marker\* or magnetic symbol\* or scenario-based).tw,kw. (1327)
- 5 (train\* or simulation\* or prepare\* or educational or serious game\*).tw,kw. (1475558)
- 6 4 and 5 (470)
- 7 3 or 6 (753)



1  
2  
3 ERIC  
4

5 emergo OR "train simulation" OR "table simulation" OR macsim OR "ETS simulation" OR "ETS  
6 instructor" OR "Distributed Cognition for Teamwork" OR "Train System" OR DigEmergo OR "ISEE  
7 Hospital"  
8

9 OR  
10

11 "Train Systems" OR "train simulations" OR "table simulations" OR "ETS instructors" OR "ETS  
12 simulations" OR "tabletop exercises" OR "tabletop exercise"  
13

14 OR  
15

16 Whiteboard OR "adhesive label" OR "adhesive labels" OR "movable marker" OR "movable markers"  
17 OR "magnetic symbol" OR "magnetic symbols" OR scenario-based  
18

19 AND  
20

21 train\* OR simulation\* OR prepare\* OR educational OR "serious game" OR "serious games"  
22  
23  
24  
25  
26  
27  
28  
29  
30  
31  
32  
33  
34  
35  
36  
37  
38  
39  
40  
41  
42  
43  
44  
45  
46  
47  
48  
49  
50  
51  
52  
53  
54  
55  
56  
57  
58  
59  
60

## Grey literature

1  
2  
3  
4  
5  
6 <http://ansm.sante.fr/>  
7 [http://iucpq.qc.ca/fr/institut/qualite-et-performance/evaluation-des-technologies-et-modes-d-](http://iucpq.qc.ca/fr/institut/qualite-et-performance/evaluation-des-technologies-et-modes-d-intervention-en-sante-etmis/accueil)  
8 <https://www.adelaide.edu.au/ahta/>  
9 <https://www.ahrq.gov/>  
10 <https://aqoa.qc.ca/aqoa/>  
11 <https://www.base-search.net/>  
12 <https://www.cadth.ca/fr>  
13 <http://www.chus.qc.ca/academique-ruis/>  
14 <http://www.crd.york.ac.uk/PanHTA/>  
15 <https://cse.google.com/cse/home?cx=006602048900252416398:sju5c9cfyea&hl=en>  
16 <https://scholar.google.ca/>  
17 <https://www.cadth.ca/resources/finding-evidence/grey-matters>  
18 <https://www.cebm.net/>  
19 <https://www.guideline.gov/>  
20 <https://www.kce.fgov.be/fr>  
21 <https://nrepp.samhsa.gov/landing.aspx>  
22 <http://www.horizonsscanning.gov.au/>  
23 <https://www.cma.ca/Fr/Pages/clinical-practice-guidelines.aspx>  
24 <http://www.msac.gov.au/>  
25 <https://www.nice.org.uk/>  
26 <https://www.nihr.ac.uk/>  
27 <https://www.crd.york.ac.uk/CRDWeb/>  
28 <http://www.opengrey.eu/>  
29 <https://papyrus.bib.umontreal.ca/xmlui/>  
30 <http://www.crd.york.ac.uk/PROSPERO/searchadvanced.php>  
31 <https://www.york.ac.uk/crd/research/>  
32 <https://www.tripdatabase.com/>  
33 <http://vortal.htai.org/>  
34 <http://oaister.worldcat.org>  
35  
36  
37  
38  
39  
40  
41  
42  
43  
44  
45  
46  
47  
48  
49  
50  
51  
52  
53  
54  
55  
56  
57  
58  
59  
60

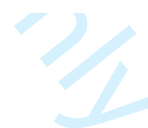

## SUPPLEMENTARY MATERIAL II – CHECKLIST DEVELOPED BY HAWKER AND COLLEAGUES

1. Abstract and title: Did they provide a clear description of the study?
 

|           |                                                            |
|-----------|------------------------------------------------------------|
| Good      | Structured abstract with full information and clear title. |
| Fair      | Abstract with most of the information.                     |
| Poor      | Inadequate abstract.                                       |
| Very Poor | No abstract.                                               |
  
2. Introduction and aims: Was there a good background and clear statement of the aims of the research?
 

|           |                                                                                                                                                                                                    |
|-----------|----------------------------------------------------------------------------------------------------------------------------------------------------------------------------------------------------|
| Good      | Full but concise background to discussion/study containing up-to-date literature review and highlighting gaps in knowledge.<br>Clear statement of aim AND objectives including research questions. |
| Fair      | Some background and literature review.<br>Research questions outlined.                                                                                                                             |
| Poor      | Some background but no aim/objectives/questions, OR<br>Aims/objectives but inadequate background.                                                                                                  |
| Very Poor | No mention of aims/objectives.<br>No background or literature review.                                                                                                                              |
  
3. Method and data: Is the method appropriate and clearly explained?
 

|           |                                                                                                                                  |
|-----------|----------------------------------------------------------------------------------------------------------------------------------|
| Good      | Method is appropriate and described clearly (e.g., questionnaires included). Clear details of the data collection and recording. |
| Fair      | Method appropriate, description could be better.<br>Data described.                                                              |
| Poor      | Questionable whether method is appropriate.<br>Method described inadequately.<br>Little description of data.                     |
| Very Poor | No mention of method, AND/OR<br>Method inappropriate, AND/OR<br>No details of data.                                              |
  
4. Sampling: Was the sampling strategy appropriate to address the aims?
 

|           |                                                                                                                                                                                                          |
|-----------|----------------------------------------------------------------------------------------------------------------------------------------------------------------------------------------------------------|
| Good      | Details (age/gender/race/contact) of who was studied and how they were recruited.<br>Why this group was targeted.<br>The sample size was justified for the study.<br>Response rates shown and explained. |
| Fair      | Sample size justified.<br>Most information given, but some missing.                                                                                                                                      |
| Poor      | Sampling mentioned but few descriptive details.                                                                                                                                                          |
| Very Poor | No details of sample.                                                                                                                                                                                    |
  
5. Data analysis: Was the description of the data analysis sufficiently rigorous?
 

|      |                                                                                                                                                |
|------|------------------------------------------------------------------------------------------------------------------------------------------------|
| Good | Clear description of how analysis was done.<br>Qualitative studies: Description of how themes derived/respondent validation or triangulations. |
|------|------------------------------------------------------------------------------------------------------------------------------------------------|

- 1  
2  
3 Quantitative studies: Reasons for tests selected hypothesis  
4 driven/numbers add up/statistical significance discussed.  
5 Fair Qualitative: Descriptive discussion of analysis  
6 Quantitative  
7 Poor Minimal details about analysis.  
8 Very Poor No discussion of analysis.  
9
- 10  
11 6. Ethics and bias: Have ethical issues been addressed, and what has necessary ethical approval  
12 gained? Has the relationship between researchers and participants been adequately considered?  
13 Good Ethics: Where necessary issues of confidentiality, sensitivity, and consent  
14 were addressed.  
15 Fair Bias: Researcher was reflexive and/or aware of own bias.  
16 Lip service was paid to above (i.e., these issues were acknowledged).  
17 Poor Brief mention of issues.  
18 Very Poor No mention of issues.  
19
- 20 7. Results: Is there a clear statement of the findings?  
21 Good Findings explicit, easy to understand, and in logical progression.  
22 Tables, if present, are explained in text.  
23 Results relate directly to aims.  
24 Sufficient data are presented to support findings.  
25 Fair Findings mentioned but more explanation could be given.  
26 Data presented relate directly to results.  
27 Poor Findings presented haphazardly, not explained, and do not progress  
28 logically from results.  
29 Very Poor Findings not mentioned or do not relate to aims.  
30
- 31 8. Transferability or generalizability: Are the findings of this study transferable (generalizable) to a  
32 wider population?  
33 Good Context and setting of the study is described sufficiently to allow  
34 comparison with other contexts and settings, plus high score in Question  
35 4 (sampling)  
36 Fair Some context and setting described, but more needed to replicate or  
37 compare the study with others, PLUS fair score or higher in Question 4.  
38 Poor Minimal description of context/setting.  
39 Very Poor No description of context/setting.  
40
- 41 9. Implications and usefulness: How important are these findings to policy and practice?  
42 Good Contributes something new and/or different in terms of  
43 understanding/insight or perspective.  
44 Suggests ideas for further research.  
45 Suggests implications for policy and/or practice.  
46 Fair Two of the above (state what is missing in comments).  
47 Poor Only one of the above.  
48 Very Poor None of the above.  
49  
50  
51  
52  
53  
54  
55  
56  
57  
58  
59  
60

**SUPPLEMENTARY MATERIAL III – JBI CRITICAL APPRAISAL CHECKLIST  
FOR TEXT AND OPINION PAPERS**

**JBI Critical Appraisal Checklist for Text and Opinion Papers**

Reviewer \_\_\_\_\_ Date \_\_\_\_\_

Author \_\_\_\_\_ Year \_\_\_\_\_ Record Number

-----

|                                                                                                             | Yes                      | No                       | Unclear                  | Not applicable           |
|-------------------------------------------------------------------------------------------------------------|--------------------------|--------------------------|--------------------------|--------------------------|
| 1. Is the source of the opinion clearly identified?                                                         | <input type="checkbox"/> | <input type="checkbox"/> | <input type="checkbox"/> | <input type="checkbox"/> |
| 2. Does the source of opinion have standing in the field of expertise?                                      | <input type="checkbox"/> | <input type="checkbox"/> | <input type="checkbox"/> | <input type="checkbox"/> |
| 3. Are the interests of the relevant population the central focus of the opinion?                           | <input type="checkbox"/> | <input type="checkbox"/> | <input type="checkbox"/> | <input type="checkbox"/> |
| 4. Is the stated position the result of an analytical process, and is there logic in the opinion expressed? | <input type="checkbox"/> | <input type="checkbox"/> | <input type="checkbox"/> | <input type="checkbox"/> |
| 5. Is there reference to the extant literature?                                                             | <input type="checkbox"/> | <input type="checkbox"/> | <input type="checkbox"/> | <input type="checkbox"/> |
| 6. Is any incongruence with the literature/sources logically defended?                                      | <input type="checkbox"/> | <input type="checkbox"/> | <input type="checkbox"/> | <input type="checkbox"/> |

Overall appraisal: Include  Exclude  Seek further info

Comments (Including reason for exclusion)

---



---



---

## Preferred Reporting Items for Systematic reviews and Meta-Analyses extension for Scoping Reviews (PRISMA-ScR) Checklist

| SECTION                           | ITEM | PRISMA-ScR CHECKLIST ITEM                                                                                                                                                                                                                                                 | REPORTED ON PAGE #                        |
|-----------------------------------|------|---------------------------------------------------------------------------------------------------------------------------------------------------------------------------------------------------------------------------------------------------------------------------|-------------------------------------------|
| <b>TITLE</b>                      |      |                                                                                                                                                                                                                                                                           |                                           |
| Title                             | 1    | Identify the report as a scoping review.                                                                                                                                                                                                                                  | <a href="#">Click here to enter text.</a> |
| <b>ABSTRACT</b>                   |      |                                                                                                                                                                                                                                                                           |                                           |
| Structured summary                | 2    | Provide a structured summary that includes (as applicable): background, objectives, eligibility criteria, sources of evidence, charting methods, results, and conclusions that relate to the review questions and objectives.                                             | <a href="#">Click here to enter text.</a> |
| <b>INTRODUCTION</b>               |      |                                                                                                                                                                                                                                                                           |                                           |
| Rationale                         | 3    | Describe the rationale for the review in the context of what is already known. Explain why the review questions/objectives lend themselves to a scoping review approach.                                                                                                  | <a href="#">Click here to enter text.</a> |
| Objectives                        | 4    | Provide an explicit statement of the questions and objectives being addressed with reference to their key elements (e.g., population or participants, concepts, and context) or other relevant key elements used to conceptualize the review questions and/or objectives. | <a href="#">Click here to enter text.</a> |
| <b>METHODS</b>                    |      |                                                                                                                                                                                                                                                                           |                                           |
| Protocol and registration         | 5    | Indicate whether a review protocol exists; state if and where it can be accessed (e.g., a Web address); and if available, provide registration information, including the registration number.                                                                            | <a href="#">Click here to enter text.</a> |
| Eligibility criteria              | 6    | Specify characteristics of the sources of evidence used as eligibility criteria (e.g., years considered, language, and publication status), and provide a rationale.                                                                                                      | <a href="#">Click here to enter text.</a> |
| Information sources*              | 7    | Describe all information sources in the search (e.g., databases with dates of coverage and contact with authors to identify additional sources), as well as the date the most recent search was executed.                                                                 | <a href="#">Click here to enter text.</a> |
| Search                            | 8    | Present the full electronic search strategy for at least 1 database, including any limits used, such that it could be repeated.                                                                                                                                           | <a href="#">Click here to enter text.</a> |
| Selection of sources of evidence† | 9    | State the process for selecting sources of evidence (i.e., screening and eligibility) included in the scoping review.                                                                                                                                                     | <a href="#">Click here to enter text.</a> |
| Data charting process‡            | 10   | Describe the methods of charting data from the included sources of evidence (e.g., calibrated forms                                                                                                                                                                       | <a href="#">Click here to</a>             |

| SECTION                                               | ITEM | PRISMA-ScR CHECKLIST ITEM                                                                                                                                                                              | REPORTED ON PAGE #        |
|-------------------------------------------------------|------|--------------------------------------------------------------------------------------------------------------------------------------------------------------------------------------------------------|---------------------------|
|                                                       |      | or forms that have been tested by the team before their use, and whether data charting was done independently or in duplicate) and any processes for obtaining and confirming data from investigators. | enter text.               |
| Data items                                            | 11   | List and define all variables for which data were sought and any assumptions and simplifications made.                                                                                                 | Click here to enter text. |
| Critical appraisal of individual sources of evidence§ | 12   | If done, provide a rationale for conducting a critical appraisal of included sources of evidence; describe the methods used and how this information was used in any data synthesis (if appropriate).  | Click here to enter text. |
| Synthesis of results                                  | 13   | Describe the methods of handling and summarizing the data that were charted.                                                                                                                           | Click here to enter text. |
| <b>RESULTS</b>                                        |      |                                                                                                                                                                                                        |                           |
| Selection of sources of evidence                      | 14   | Give numbers of sources of evidence screened, assessed for eligibility, and included in the review, with reasons for exclusions at each stage, ideally using a flow diagram.                           | Click here to enter text. |
| Characteristics of sources of evidence                | 15   | For each source of evidence, present characteristics for which data were charted and provide the citations.                                                                                            | Click here to enter text. |
| Critical appraisal within sources of evidence         | 16   | If done, present data on critical appraisal of included sources of evidence (see item 12).                                                                                                             | Click here to enter text. |
| Results of individual sources of evidence             | 17   | For each included source of evidence, present the relevant data that were charted that relate to the review questions and objectives.                                                                  | Click here to enter text. |
| Synthesis of results                                  | 18   | Summarize and/or present the charting results as they relate to the review questions and objectives.                                                                                                   | Click here to enter text. |
| <b>DISCUSSION</b>                                     |      |                                                                                                                                                                                                        |                           |
| Summary of evidence                                   | 19   | Summarize the main results (including an overview of concepts, themes, and types of evidence available), link to the review questions and objectives, and consider the relevance to key groups.        | Click here to enter text. |
| Limitations                                           | 20   | Discuss the limitations of the scoping review process.                                                                                                                                                 | Click here to enter text. |
| Conclusions                                           | 21   | Provide a general interpretation of the results with respect to the review questions and objectives, as                                                                                                | Click here to             |

| SECTION        | ITEM | PRISMA-ScR CHECKLIST ITEM                                                                                                                                                       | REPORTED ON PAGE #        |
|----------------|------|---------------------------------------------------------------------------------------------------------------------------------------------------------------------------------|---------------------------|
|                |      | well as potential implications and/or next steps.                                                                                                                               | enter text.               |
| <b>FUNDING</b> |      |                                                                                                                                                                                 |                           |
| Funding        | 22   | Describe sources of funding for the included sources of evidence, as well as sources of funding for the scoping review. Describe the role of the funders of the scoping review. | Click here to enter text. |

JBI = Joanna Briggs Institute; PRISMA-ScR = Preferred Reporting Items for Systematic reviews and Meta-Analyses extension for Scoping Reviews.

\* Where *sources of evidence* (see second footnote) are compiled from, such as bibliographic databases, social media platforms, and Web sites.

† A more inclusive/heterogeneous term used to account for the different types of evidence or data sources (e.g., quantitative and/or qualitative research, expert opinion, and policy documents) that may be eligible in a scoping review as opposed to only studies. This is not to be confused with *information sources* (see first footnote).

‡ The frameworks by Arksey and O'Malley (6) and Levac and colleagues (7) and the JBI guidance (4, 5) refer to the process of data extraction in a scoping review as data charting.

§ The process of systematically examining research evidence to assess its validity, results, and relevance before using it to inform a decision. This term is used for items 12 and 19 instead of "risk of bias" (which is more applicable to systematic reviews of interventions) to include and acknowledge the various sources of evidence that may be used in a scoping review (e.g., quantitative and/or qualitative research, expert opinion, and policy document).

From: Tricco AC, Lillie E, Zarin W, O'Brien KK, Colquhoun H, Levac D, et al. PRISMA Extension for Scoping Reviews (PRISMA-ScR): Checklist and Explanation. *Ann Intern Med.* ;169:467–473. doi: 10.7326/M18-0850



**PRISMA-P (Preferred Reporting Items for Systematic review and Meta-Analysis Protocols) 2015 checklist: recommended items to address in a systematic review protocol\***

| Section and topic                 | Item No | Checklist item                                                                                                                                                                                                                |
|-----------------------------------|---------|-------------------------------------------------------------------------------------------------------------------------------------------------------------------------------------------------------------------------------|
| <b>ADMINISTRATIVE INFORMATION</b> |         |                                                                                                                                                                                                                               |
| Title:                            |         |                                                                                                                                                                                                                               |
| Identification                    | 1a      | Identify the report as a protocol of a systematic review                                                                                                                                                                      |
| Update                            | 1b      | If the protocol is for an update of a previous systematic review, identify as such                                                                                                                                            |
| Registration                      | 2       | If registered, provide the name of the registry (such as PROSPERO) and registration number                                                                                                                                    |
| Authors:                          |         |                                                                                                                                                                                                                               |
| Contact                           | 3a      | Provide name, institutional affiliation, e-mail address of all protocol authors; provide physical mailing address of corresponding author                                                                                     |
| Contributions                     | 3b      | Describe contributions of protocol authors and identify the guarantor of the review                                                                                                                                           |
| Amendments                        | 4       | If the protocol represents an amendment of a previously completed or published protocol, identify as such and list changes; otherwise, state plan for documenting important protocol amendments                               |
| Support:                          |         |                                                                                                                                                                                                                               |
| Sources                           | 5a      | Indicate sources of financial or other support for the review                                                                                                                                                                 |
| Sponsor                           | 5b      | Provide name for the review funder and/or sponsor                                                                                                                                                                             |
| Role of sponsor or funder         | 5c      | Describe roles of funder(s), sponsor(s), and/or institution(s), if any, in developing the protocol                                                                                                                            |
| <b>INTRODUCTION</b>               |         |                                                                                                                                                                                                                               |
| Rationale                         | 6       | Describe the rationale for the review in the context of what is already known                                                                                                                                                 |
| Objectives                        | 7       | Provide an explicit statement of the question(s) the review will address with reference to participants, interventions, comparators, and outcomes (PICO)                                                                      |
| <b>METHODS</b>                    |         |                                                                                                                                                                                                                               |
| Eligibility criteria              | 8       | Specify the study characteristics (such as PICO, study design, setting, time frame) and report characteristics (such as years considered, language, publication status) to be used as criteria for eligibility for the review |
| Information sources               | 9       | Describe all intended information sources (such as electronic databases, contact with study authors, trial registers or other grey literature sources) with planned dates of coverage                                         |
| Search strategy                   | 10      | Present draft of search strategy to be used for at least one electronic database, including planned limits, such that it could be repeated                                                                                    |
| Study records:                    |         |                                                                                                                                                                                                                               |
| Data management                   | 11a     | Describe the mechanism(s) that will be used to manage records and data throughout the review                                                                                                                                  |

|    |                                    |     |                                                                                                                                                                                                                                                  |
|----|------------------------------------|-----|--------------------------------------------------------------------------------------------------------------------------------------------------------------------------------------------------------------------------------------------------|
| 1  |                                    |     |                                                                                                                                                                                                                                                  |
| 2  |                                    |     |                                                                                                                                                                                                                                                  |
| 3  | Selection process                  | 11b | State the process that will be used for selecting studies (such as two independent reviewers) through each phase of the review (that is, screening, eligibility and inclusion in meta-analysis)                                                  |
| 4  |                                    |     |                                                                                                                                                                                                                                                  |
| 5  | Data collection process            | 11c | Describe planned method of extracting data from reports (such as piloting forms, done independently, in duplicate), any processes for obtaining and confirming data from investigators                                                           |
| 6  |                                    |     |                                                                                                                                                                                                                                                  |
| 7  | Data items                         | 12  | List and define all variables for which data will be sought (such as PICO items, funding sources), any pre-planned data assumptions and simplifications                                                                                          |
| 8  |                                    |     |                                                                                                                                                                                                                                                  |
| 9  | Outcomes and prioritization        | 13  | List and define all outcomes for which data will be sought, including prioritization of main and additional outcomes, with rationale                                                                                                             |
| 10 |                                    |     |                                                                                                                                                                                                                                                  |
| 11 | Risk of bias in individual studies | 14  | Describe anticipated methods for assessing risk of bias of individual studies, including whether this will be done at the outcome or study level, or both; state how this information will be used in data synthesis                             |
| 12 |                                    |     |                                                                                                                                                                                                                                                  |
| 13 | Data synthesis                     | 15a | Describe criteria under which study data will be quantitatively synthesised                                                                                                                                                                      |
| 14 |                                    | 15b | If data are appropriate for quantitative synthesis, describe planned summary measures, methods of handling data and methods of combining data from studies, including any planned exploration of consistency (such as $I^2$ , Kendall's $\tau$ ) |
| 15 |                                    | 15c | Describe any proposed additional analyses (such as sensitivity or subgroup analyses, meta-regression)                                                                                                                                            |
| 16 |                                    | 15d | If quantitative synthesis is not appropriate, describe the type of summary planned                                                                                                                                                               |
| 17 |                                    |     |                                                                                                                                                                                                                                                  |
| 18 | Meta-bias(es)                      | 16  | Specify any planned assessment of meta-bias(es) (such as publication bias across studies, selective reporting within studies)                                                                                                                    |
| 19 |                                    |     |                                                                                                                                                                                                                                                  |
| 20 | Confidence in cumulative evidence  | 17  | Describe how the strength of the body of evidence will be assessed (such as GRADE)                                                                                                                                                               |
| 21 |                                    |     |                                                                                                                                                                                                                                                  |

**\* It is strongly recommended that this checklist be read in conjunction with the PRISMA-P Explanation and Elaboration (cite when available) for important clarification on the items. Amendments to a review protocol should be tracked and dated. The copyright for PRISMA-P (including checklist) is held by the PRISMA-P Group and is distributed under a Creative Commons Attribution Licence 4.0.**

*From: Shamseer L, Moher D, Clarke M, Ghersi D, Liberati A, Petticrew M, Shekelle P, Stewart L, PRISMA-P Group. Preferred reporting items for systematic review and meta-analysis protocols (PRISMA-P) 2015: elaboration and explanation. BMJ. 2015 Jan 2;349(jan02 1):g7647.*

# BMJ Open

## Use of tabletop exercises for healthcare education in disaster medicine and non-disaster medicine: a scoping review protocol

|                                 |                                                                                                                                                                                                                                                                                                                                                                                                                                                                                                                                                                                                                                                                                                                                                                                                                                                                                                                                       |
|---------------------------------|---------------------------------------------------------------------------------------------------------------------------------------------------------------------------------------------------------------------------------------------------------------------------------------------------------------------------------------------------------------------------------------------------------------------------------------------------------------------------------------------------------------------------------------------------------------------------------------------------------------------------------------------------------------------------------------------------------------------------------------------------------------------------------------------------------------------------------------------------------------------------------------------------------------------------------------|
| Journal:                        | <i>BMJ Open</i>                                                                                                                                                                                                                                                                                                                                                                                                                                                                                                                                                                                                                                                                                                                                                                                                                                                                                                                       |
| Manuscript ID                   | bmjopen-2019-032662.R1                                                                                                                                                                                                                                                                                                                                                                                                                                                                                                                                                                                                                                                                                                                                                                                                                                                                                                                |
| Article Type:                   | Protocol                                                                                                                                                                                                                                                                                                                                                                                                                                                                                                                                                                                                                                                                                                                                                                                                                                                                                                                              |
| Date Submitted by the Author:   | 04-Sep-2019                                                                                                                                                                                                                                                                                                                                                                                                                                                                                                                                                                                                                                                                                                                                                                                                                                                                                                                           |
| Complete List of Authors:       | Frégeau, Amélie; Hôpital du Sacré-Coeur de Montréal, Emergency medicine<br>Cournoyer, Alexis; Université de Montréal Faculté de médecine, ; Hôpital du Sacré-Coeur de Montréal, Department of Emergency Medicine<br>Maheu-Cadotte, Marc-André; Institut De Cardiologie de Montréal, ; Université de Montréal, Faculty of Nursing<br>Iseppon, Massimiliano; Hôpital Maisonneuve-Rosemont, Emergency medicine<br>Soucy, Nathalie; Centre Hospitalier de L'Université de Montréal, Direction of Education and of CHUM Academy<br>St-Cyr Bourque, Julie; Centre Hospitalier de L'Université de Montréal, Emergency medicine department<br>Cossette, Sylvie ; Montreal Heart Institute Research Centre, Research and International development<br>Castonguay, Véronique; Hôpital du Sacré-Coeur de Montréal, Emergency medicine department<br>Fleet, Richard; Université Laval, Département de médecine familiale et de médecine d'urgence |
| <b>Primary Subject Heading</b>: | Medical education and training                                                                                                                                                                                                                                                                                                                                                                                                                                                                                                                                                                                                                                                                                                                                                                                                                                                                                                        |
| Secondary Subject Heading:      | Communication, Emergency medicine, Intensive care, Public health, Qualitative research                                                                                                                                                                                                                                                                                                                                                                                                                                                                                                                                                                                                                                                                                                                                                                                                                                                |
| Keywords:                       | MEDICAL EDUCATION & TRAINING, ACCIDENT & EMERGENCY MEDICINE, HEALTH SERVICES ADMINISTRATION & MANAGEMENT, INTENSIVE & CRITICAL CARE, PRIMARY CARE, QUALITATIVE RESEARCH                                                                                                                                                                                                                                                                                                                                                                                                                                                                                                                                                                                                                                                                                                                                                               |
|                                 |                                                                                                                                                                                                                                                                                                                                                                                                                                                                                                                                                                                                                                                                                                                                                                                                                                                                                                                                       |

SCHOLARONE™  
Manuscripts

1  
2  
3  
4  
5 **Use of tabletop exercises for healthcare education in disaster medicine and non-**  
6 **disaster medicine: a scoping review protocol**  
7

8 Amélie Frégeau, Alexis Cournoyer, Marc-André Maheu-Cadotte, Massimiliano Iseppon,  
9 Nathalie Soucy, Julie St-Cyr Bourque, Sylvie Cossette, Véronique Castonguay and  
10 Richard Fleet  
11

12  
13 Amélie Frégeau

14 Master student in clinical sciences and education, Faculty of Health Sciences, Université  
15 Laval, Québec, Canada

16 Senior resident in specialised emergency medicine, Université de Montréal, Montreal,  
17 Canada  
18

19  
20 Alexis Cournoyer

21 Doctoral student, Faculty of Medicine, Université de Montréal, Montreal, Canada

22 Emergency physician, Hôpital du Sacré-Cœur de Montréal, Montreal, Canada

23 Researcher, Hôpital du Sacré-Coeur de Montréal, Montreal, Canada  
24

25  
26 Marc-André Maheu-Cadotte

27 Doctoral student, Faculty of Nursing, Université de Montréal, Montreal, Canada

28 Doctoral student, Montreal Heart Institute Research Centre, Montreal, Canada

29 Doctoral student, Centre de recherche du Centre hospitalier de l'Université de Montréal,  
30 Montreal, Canada  
31

32  
33 Massimiliano Iseppon

34 Emergency medicine ultrasound fellowship completed

35 Emergency physician, Hôpital Maisonneuve-Rosemont, Montreal, Canada  
36  
37

38  
39 Nathalie Soucy

40 PhD psychology, Université Laval, Quebec, Canada

41 Education consultant, Centre hospitalier de l'Université de Montréal, Montreal, Canada  
42

43  
44 Julie St-Cyr Bourque

45 Professor, Université de Montréal, Montreal, Canada

46 Emergency physician, Centre hospitalier de l'Université de Montréal, Montreal, Canada  
47

48  
49 Sylvie Cossette

50 Full professor, Faculty of Nursing, Université de Montréal, Montreal, Canada

51 Researcher, Montreal Heart Institute Research Centre, Montreal, Canada  
52

53  
54 Véronique Castonguay

55 Master in education, Université de Montréal, Montreal, Canada

56 Professor and leader of the educational centre of Université de Montréal, Montreal,  
57  
58

1  
2  
3 Canada

4 Emergency physician, Hôpital du Sacré-Cœur de Montréal, Montreal, Canada

6  
7 Richard Fleet

8 PhD clinical sciences, Université Laval, Quebec, Canada

9 Financed researcher from Fonds de recherche du Québec en santé (FRQS), Université  
10 Laval, Quebec, Canada

11 Full professor, Faculty of Medicine, Université Laval, Quebec, Canada

12 Emergency physician, Hôpital Hôtel-Dieu de Lévis, Quebec, Canada

13 Psychologist, Quebec, Canada

15  
16 Correspondence to:

17 Amélie Frégeau

18 [amelie.fregeau@umontreal.ca](mailto:amelie.fregeau@umontreal.ca)

19 514-338-2222, ext. 3234

20 Fax: 514-228-3513

21 Hôpital du Sacré-Coeur de Montréal

22 5400 Boulevard Gouin Ouest, Door Z-1145

23 H4J 1C5

24 Montréal (Quebec)

25 Canada

26  
27  
28 Word count: 2628

## ABSTRACT

**Introduction:** There is a growing interest in developing interprofessional education (IPE) as a means to cultivate collaborative practice. Various pedagogical designs of IPE activities, such as tabletop exercises (TTX), have been proposed by clinician educators to promote collaborative practice. A TTX is a meeting where various professionals need to take charge of a situation. TTX are an educational initiative that has been as of now in disaster medicine for disaster preparedness. TTX have also been used, to a lesser extent, in non-disaster medicine. As TTX are gaining popularity, performing a review about the scope of their use as well as their outcomes is indicated. Hence, the aim of this scoping review is to map the uses of TTX in various contexts of healthcare and to classify their reported outcomes according to the Kirkpatrick Model of outcomes in educational programs. The findings of this review will inform future efforts to TTX into the training of healthcare professionals.

**Methods and analysis:** A search of the literature will be conducted using a combination of MeSH terms and keywords in PubMed, MEDLINE, EBM Reviews, CINAHL, EMBASE, and ERIC, along with a search of the grey literature using various online platforms. The search will be performed after the publication of this protocol and will be repeated one month prior to the submission for publication of the final review. Studies reporting on the use of TTX in healthcare in English or French will be included. Two reviewers will independently perform article screening and data extraction.

**Results:** Various uses of TTX will be classified in disaster medicine versus non-disaster medicine and in IPE versus non-IPE in an effort to map their use. Moreover, following the same mapping objective, outcomes of TTX will be reported according to the Kirkpatrick Model of outcomes of educational programs. Even though quality assessment of a study is not mandatory for a scoping review, the quality of the included articles will be assessed by two reviewers using a validated checklist developed by Hawker and colleagues, as well as the JBI Critical Appraisal Checklist for Text and Opinion Papers in order to provide more information about current literature to clinician educators.

**Ethics and dissemination:** No Institutional Review Board approval is required for this review. Results will be submitted for publication in a peer-reviewed journal.

1  
2  
3 **Keywords:** medical education, tabletop exercises, healthcare, disaster medicine, training,  
4 simulation, interprofessional education  
5  
6  
7  
8  
9  
10  
11  
12  
13  
14  
15  
16  
17  
18  
19  
20  
21  
22  
23  
24  
25  
26  
27  
28  
29  
30  
31  
32  
33  
34  
35  
36  
37  
38  
39  
40  
41  
42  
43  
44  
45  
46  
47  
48  
49  
50  
51  
52  
53  
54  
55  
56  
57  
58  
59  
60

For peer review only

### STRENGTHS AND LIMITATIONS OF THIS STUDY

- The search strategy proposed here is broad and therefore unlikely to miss any significant articles.
- The results of this study will be reported using a strategy based on the Preferred Reporting Items for Systematic Review and Meta-Analyses extension for Scoping Reviews (PRISMA-ScR) Checklist and the scoping methodological framework developed by Arksey and O'Malley.
- In addition to the standard requirements for scoping reviews, a formal quality assessment of included studies will be conducted using a checklist developed by Hawker and colleagues, as well as the JBI Critical Appraisal Checklist for Text and Opinion Papers.
- The study selection, the evaluation of the quality of the retained articles and data extraction will be performed by two independent reviewers to minimize the risk of bias or errors.
- The outcomes of each included study will also be reported according to the Kirkpatrick Model of outcomes of educational programs.



## INTRODUCTION

Most serious errors in critical care occur because of poor communication or collaboration rather than individual mistakes.[1] Therefore, interest in interprofessional education (IPE) as a means to cultivate collaborative practice continues to grow among clinician educators worldwide.[2-3] According to the Centre for the Advancement in Interprofessional Education (CAIPE), IPE occurs when “two or more professions learn with, from and about each other to improve collaboration and the quality of care”. [4] IPE aims to develop competencies of collaborative practice in health workers including role clarification, patient-centered care, teamwork, collaborative leadership, interprofessional communication and interpersonal conflict resolution.[5] Various pedagogical designs of IPE activities have been used by clinician educators to develop collaborative practice in health workers. [6] More specifically, tabletop exercises (TTX) have been proposed as an IPE activity.[7]

TTX are an educational initiative that has been thus far mostly used in disaster preparedness.[8-12] A TTX is a meeting where various professionals are required to respond to simulated critical situations, such as in disaster medicine. These exercises are used to evaluate the preparedness of an organization and to educate participants on their roles during the response. Using TTX as a simulation tool, hospital administrators can assess whether professional roles and responsibilities throughout the response system are well understood and accomplished promptly.[13]

Moreover, TTX have also been used, to a lesser extent, in non-disaster medicine.[14-15] However, no review have described the different uses of TTX whether in disaster or non-disaster medicine. As TTX are gaining in popularity, performing a review about the various context of its use is indicated. Given the broad scope of this study, a scoping review methodology seems the best option as it aims “to examine the extent, range and nature of research activity. This type of rapid review might not describe research findings in any detail but is a useful way of mapping fields of study where it is difficult to visualize the range of material that might be available”[16] In this scoping review, the various contexts in which TTX were used will be classified as disaster medicine or non-disaster medicine and as IPE or not IPE. An effort will be made to classify the outcomes of their use. Hence, the purpose of this scoping review is to map the various contexts in

1  
2  
3 which TTX are used as well as to examine their outcomes in healthcare setting. The  
4 findings of this review will guide future research in this area and inform clinician educators  
5 and administrators who are considering or developing tabletop exercises in their institution.  
6  
7  
8  
9

## 10 11 **METHODS**

12 The protocol for this scoping review is based on Arksey & O'Malley's five-stage  
13 methodological framework statement and reported according to the Preferred Reporting  
14 Items for Systematic Review and Meta-Analyses extension for Scoping Reviews  
15 (PRISMA-ScR) Checklist.[16-18] The development of this protocol started in June 2018  
16 and publication of the review is estimated for June 2020.  
17  
18  
19  
20  
21  
22

### 23 **Stage 1: Identifying the research question**

24 This scoping review aims to report the uses of tabletop exercises in healthcare.  
25

#### 26 Definitions:

27  
28 Tabletop exercises are usually defined as a form discussion-based activity that is  
29 guided by a facilitator. They usually involve a dialogue on the steps to take in response to  
30 a hypothetical scenario. Since there are various TTX designs, the definition that will be  
31 used in this scoping review is the following:  
32  
33  
34

35 "A TTX is a type of real or virtual board game. The board depicts a disaster scene or a  
36 healthcare setting and the participants play as their own professional role in real life. The  
37 participants move around symbol units (also called "movable markers") which represent  
38 healthcare workers, patients and available resources. Participants accomplish their duties  
39 as they would in real life."[12]  
40  
41  
42  
43

44 The definition that will be used for IPE is the following:

45 "When two or more professions learn with, from and about each other to improve  
46 collaboration and the quality of care".[4]  
47  
48

49 The definition that will be used for disaster medicine is the following:

50 "Disaster medicine is defined as the study and collaborative application of various health  
51 disciplines to the prevention, preparedness, response and recovery from the health  
52 problems arising from disaster."[19]  
53  
54  
55  
56  
57  
58  
59  
60

Contexts not attributive to the definition of disaster medicine will be classified in “non-disaster medicine”.

### Research question:

In addition to classifying contexts of TTX’s uses in disaster medicine versus non-disaster medicine and in IPE versus non-IPE, we plan to report the outcomes of each included study according to the Kirkpatrick Model of outcomes of educational programs.[20] This model determines aptitude from training and educational programs based on four levels of criteria: reaction, learning, behaviour, and organizational results. Generally, building an educational intervention that addresses higher levels of the Kirkpatrick Model and measures higher-level outcomes is more complete than building one that only addresses the lower levels.[20] Therefore, the following research questions will be addressed:

- What uses of TTX have been made, and in which contexts: disaster medicine versus non disaster medicine and IPE versus non-IPE? What were the outcomes of studies that investigated the use of tabletop exercises in healthcare settings according to the Kirkpatrick Model of outcomes of educational programs?

While the primary focus of this review is to sum up in which contexts tabletop exercises have been used in healthcare and their outcomes, we will also provide a narrative review of the included studies regarding their design, setting, participants, interventions and outcomes.

### **Stage 2: Identifying relevant studies**

Eligible studies, abstracts and conference summaries will be identified through a comprehensive search of CINAHL, Embase, EBM Reviews, ERIC, MEDLINE, and PubMed, while the grey literature will be searched using various online platforms. For practical reasons, searches will be limited to articles in English and French. There will be no limit on publication date in order to generate as broad a picture as possible of educational interventions in healthcare using tabletop exercises.

The search strategy was collaboratively and iteratively developed with the assistance of a librarian. We were unable to identify a medical subject heading (MeSH)

1  
2  
3 that was specific for tabletop exercises. Hence, we developed a search strategy for PubMed  
4 using keywords related to the following concepts: tabletop exercises, whiteboards with  
5 magnetic symbols, simulation, training, serious games, desktop and board game. Open and  
6 closed vocabulary were used to determine the best possible strategy. The search strategy  
7 was adapted to search the other online databases, and similar keywords were used to search  
8 the grey literature.  
9

10  
11  
12  
13  
14 This search strategy was developed the July 24th 2018. We plan to perform the  
15 search after the publication of this protocol and will repeat it one month prior to the  
16 submission for publication to ensure it is still up to date.  
17  
18  
19

### 20 21 **Stage 3: Study selection**

#### 22 Inclusion and exclusion criteria

23  
24 The eligibility of articles will be assessed based on the following inclusion criteria:

- 25 - The population of interest, i.e. healthcare professionals, including students in a  
26 healthcare program.
- 27 - Academic and clinical settings where healthcare is provided or taught (e.g.,  
28 university, hospital, clinics) will be considered.
- 29 - Studies assessing a tabletop exercise as a stand-alone intervention or as part of  
30 a multi-component intervention (e.g., combined with a workshop or a  
31 classroom-based learning activity) will be considered.
- 32 - To be included, articles must report on at least one learning outcome from the  
33 Kirkpatrick Model (as previously described).
- 34 - All types of study designs (e.g., qualitative designs, quantitative designs and  
35 mixed methods designs) and methodologies including commentaries, case  
36 studies, descriptions of pedagogical innovations, conference summaries and  
37 viewpoint articles will be considered for inclusion. Scoping review and  
38 systematic review articles will not be considered for inclusion.  
39  
40  
41  
42  
43  
44  
45  
46  
47  
48  
49

50  
51 Given the nature of this review and to keep it as broad as possible, studies published in a  
52 language other than English or French will be excluded.  
53  
54  
55  
56  
57  
58  
59  
60

1  
2  
3 EndNote software (Version X9, Clarivate Analytics) will be used to import,  
4 manage, categorize and upload all collected references during the screening and selection  
5 process. If we are unable to obtain the full text of an article, we will contact the  
6 corresponding author for the article in question; failure to respond will result in study  
7 exclusion. The reference lists of all included studies will be screened to search for any  
8 additional relevant studies.  
9

10  
11  
12  
13 Two reviewers (AF, AC) will meet to discuss the criteria for inclusion and will then  
14 independently screen the titles and abstracts.  
15

16  
17 Following the initial selection process, the full text articles that are potentially  
18 relevant will be screened for eligibility by two reviewers (AF, MAMC). Any disagreements  
19 regarding study inclusion will be resolved through consensus. If consensus cannot be  
20 reached, a third reviewer (AC) will be consulted to resolve the disagreement. Reasons for  
21 excluding references at the full-text assessment stage of the screening process will be  
22 documented and reported in a PRISMA flow diagram.[18] The reviewers will meet again  
23 following full-text assessment to discuss any challenges and uncertainties related to study  
24 selection.  
25  
26  
27  
28  
29  
30

#### 31 32 **Stage 4: Charting the data**

33  
34 Two reviewers (AF, MAMC) will independently perform data extraction from  
35 studies included in the review. The research team has adapted a standardized charting form  
36 that was inspired by a protocol published by Shen et al.,[21] which was based on a similar  
37 research question that was applied to a different subject. This form was judged by members  
38 of our research team to be easy to use and relevant to our aims. The data charting domains  
39 and subdomains are described in Table 1. Reviewers will pilot the charting form on five to  
40 ten studies to determine whether this approach to data extraction is consistent with the  
41 research question and study purpose. Any relevant data that is not captured during the  
42 initial data extraction phase will be added iteratively by adapting the chart. If there is  
43 unclear or missing data in an article, we will contact the corresponding author to obtain  
44 clarification or additional data.  
45  
46  
47  
48  
49  
50  
51  
52  
53  
54  
55  
56  
57  
58  
59  
60

Although an assessment of study quality is not mandatory for a scoping review, it is strongly recommended by Arksey & O'Malley's five-stage methodological framework statement.[16] We will assess the quality of included studies to more precisely describe the

**Table 1: Data charting domains and description of subdomains**

| Domain/subdomains          | Description                                                                                                                       |
|----------------------------|-----------------------------------------------------------------------------------------------------------------------------------|
| <b>Article details</b>     |                                                                                                                                   |
| Author                     | Last name and initials of the first author                                                                                        |
| Year                       | Publication year of the article                                                                                                   |
| Country                    | Country where the study was performed                                                                                             |
| <b>Initiative details</b>  |                                                                                                                                   |
| Context                    | What was the need to organize a tabletop exercise? Does it take part of disaster medicine or of non-disaster medicine?            |
| Setting                    | Where did the educational intervention take place (e.g., community, hospital, university)?                                        |
| Theoretical framework      | What was the theoretical framework? (if available)                                                                                |
| Program delivery           | How was the program delivered (e.g., seminar, lecture, course, in-service training)?                                              |
| Instructors                | Who were the facilitators/instructors?                                                                                            |
| Program length             | How long did the program/intervention last?                                                                                       |
| <b>Study details</b>       |                                                                                                                                   |
| Study design               | What was the study design?                                                                                                        |
| Participants               | Who were the study participants? What was the sample size? Is it fulfilling the definition of interprofessional education or not? |
| Intervention               | What was the intervention? Will report as described by the study authors                                                          |
| Comparator                 | What was the comparator? (if applicable)                                                                                          |
| Study outcomes             | What did the authors identify as the study outcomes?                                                                              |
| Outcomes                   | What were the main results of the study?                                                                                          |
| <b>Kirkpatrick's level</b> |                                                                                                                                   |
| Reaction                   | Did the intervention measure the immediate perception and attitude of the learner regarding the intervention?                     |
| Learning                   | Did the intervention measure what was learned during the pedagogical intervention?                                                |
| Behaviour                  | Did the intervention measure if the learner applied the new knowledge in their daily life?                                        |
| Results                    | Did the intervention measure the organizational impact of daily use of the new knowledge at work by the learner?                  |
| <b>Risk of bias</b>        |                                                                                                                                   |
| Hawker checklist           | What is the score of the study? (if original study)                                                                               |
| JBI checklist              | What is the score of the study? (if editorial, opinion, or comment)                                                               |

current evidence on TTX in healthcare and to formulate future-oriented advice that address methodological gaps identified in the literature. For original studies, study quality will be independently assessed by two reviewers (AF, MAMC) according to a checklist developed Hawker et al.[22] This tool was chosen because it has been validated to systematically review disparate data, whether qualitative or quantitative. For editorials, opinion texts and

1  
2  
3 comments, we will assess quality using the validated JBI Critical Appraisal Checklist for  
4 Text and Opinion Papers.[23]  
5  
6  
7

### 8 **Stage 5: Collating, summarizing and reporting the results**

9  
10 We will report data on study characteristics and outcomes including the lead author,  
11 publication year, country, study context, setting, design, theoretical framework, program  
12 delivery, program duration, participants, instructors, intervention, comparator (if  
13 applicable), and the outcomes. An effort will be made to classify uses of TTX in two  
14 different fields: disaster medicine versus non-disaster medicine and IPE versus non-IPE.  
15 This classification will facilitate the mapping of current uses of TTX.  
16  
17  
18

19  
20 Moreover, for each study we will classify the outcomes using the Kirkpatrick Model  
21 of outcomes of educational programs (possible levels include reaction, learning, behaviour,  
22 and results).[20] We will report on all levels of Kirkpatrick's Model, with special inquiry  
23 into the level that is most frequently measured among the studies included in the review.  
24  
25  
26

27 Finally, results of the quality assessment will be reported using a checklist  
28 developed by Hawker et al. for each original study, and using the JBI Critical Appraisal  
29 Checklist for Text and Opinion Papers for any editorials, opinion texts or comments  
30 included in the review.[22-23]  
31  
32  
33  
34  
35

### 36 **Patient and Public Involvement**

37 No patients involved.  
38  
39  
40  
41

### 42 **ETHICS AND DISSEMINATION**

43  
44 As this will be a scoping review of previously published studies, no ethics approval  
45 is required. The study findings will be submitted to an appropriate peer-reviewed journal.  
46  
47  
48  
49

### 50 **DISCUSSION**

51 This scoping review will fill an important gap in the literature, as there are no  
52 existing reviews that exclusively focusses on mapping the use of TTX in healthcare  
53 settings. The results of this study will inform researchers, educators, clinicians, and  
54  
55  
56  
57  
58  
59  
60

1  
2  
3 administrators on the various uses of TTX in healthcare and more specifically in which  
4 domain (disaster medicine versus non-disaster medicine and IPE versus non-IPE) they are  
5 being used. Moreover, it will potentially identify gaps in Kirkpatrick's level of outcome.  
6 These findings will be used to help develop and implement future educational programs  
7 involving TTX, with the hope that enhanced training of healthcare professionals will  
8 ultimately lead to improvements in patient, care, safety and satisfaction.  
9

## 16 **AUTHOR CONTRIBUTIONS**

17 All authors contributed to the conception of the protocol. AF wrote the protocol.  
18 AC, MAMC, MI, NS, JSCB, SC, VC and RF critically revised the draft for important  
19 intellectual content. All authors have approved the final version of this submitted  
20 manuscript and agree to be accountable for all aspects related to this work.  
21  
22  
23  
24  
25  
26

## 27 **ACKNOWLEDGEMENTS**

28 This research was carried out as part of the of the first author's Masters thesis, for  
29 which she received scholarships from the followings: Centre de recherche sur les soins et  
30 les services de première ligne de l'Université Laval from Université Laval.  
31  
32  
33

34 The authors would like to thank Ms. Daniela Ziegler for helping with the design of  
35 the research methodology and Percipient Research & Consulting for their assistance with  
36 language editing.  
37  
38  
39  
40  
41

## 42 **DATA SHARING**

43 No additional data available.  
44  
45  
46  
47  
48

## 49 **COPYRIGHT**

50 The Corresponding Author has the right to grant on behalf of all authors and does  
51 grant on behalf of all authors, a worldwide licence to the Publishers and its licensees in  
52 perpetuity, in all forms, formats and media (whether known now or created in the future),  
53 to i) publish, reproduce, distribute, display and store the Contribution, ii) translate the  
54  
55  
56  
57  
58  
59  
60



1  
2  
3 Contribution into other languages, create adaptations, reprints, include within collections  
4 and create summaries, extracts and/or, abstracts of the Contribution, iii) create any other  
5 derivative work(s) based on the Contribution, iv) to exploit all subsidiary rights in the  
6 Contribution, v) the inclusion of electronic links from the Contribution to third party  
7 material where-ever it may be located; and, vi) licence any third party to do any or all of  
8 the above.  
9

### 14 **COMPETING INTERESTS**

16 All authors declare no support from any organization for the submitted work, no  
17 financial relationships with any organizations that might have an interest in the submitted  
18 work in the previous three years, and no other relationships or activities that could appear  
19 to have influenced the submitted work.  
20  
21  
22

### 24 **TRANSPARENCY DECLARATION**

26 The lead author (the manuscript's guarantor) affirms that the manuscript is an  
27 honest, accurate, and transparent account of the study being reported, that no important  
28 aspects of the study have been omitted, and that any discrepancies from the study as  
29 planned (and, if relevant, registered) have been explained.  
30  
31  
32

### 33 **FUNDING**

35 This work was supported by a \$2500 grant for research in primary care from Chaire  
36 du Docteur Sadok Besrouer de l'Université de Montréal and a \$5000 grant for research in  
37 primary care from Centre de recherche sur les soins et les services de première ligne de  
38 l'Université Laval (CERSSPL-UL) and the Centre universitaire intégré de soins et de  
39 services de première ligne (CIUSSS) de la Capitale-Nationale.  
40  
41  
42  
43  
44  
45  
46  
47  
48  
49  
50  
51  
52  
53  
54  
55  
56  
57  
58  
59  
60

**REFERENCES**

1. Lehmann R, Seitz A, Meyburg J et al. CAEP Pediatric in-hospital emergencies: real life experiences, previous training and the need for training among physicians and nurses. *BMC Research Note*. 2019;12:1-7.
2. Lutfiyya MN, Chang LF, McGrath C, Lipsky MS. The state of the science of interprofessional collaborative practice: A scoping review of the patient health-related outcomes based literature published between 2010 and 2018. *PLoS One*. 2019;14:1-18.
3. Baird J, Ashland M, Rosenbluth G. Interprofessional Teams: Current Trends and Future Directions. *Pediatric Clinics of North America*. 2019;66:739-50.
4. Gum LF, Sweet L, Greenhill J, Prideaux D. Exploring interprofessional education and collaborative practice in Australian rural health services. *Journal of Interprofessional Care*. 2019;1-11.
5. Goldman J, Kitto S, Reeves S. Examining the implementation of collaborative competencies in a critical care setting: Key challenges for enacting competency-based education. *Journal of Interprofessional Care*. 2017;32:407-15
6. Danielson J, Willgerodt M. Building a Theoretically Grounded Curricular Framework for Successful Interprofessional Education. *American Journal of Pharmaceutical Education*. 2018;82:1133-9.
7. Wong A, Ruppel H, Gang M, Ng G. "The Safety Dance": A Faculty Development Workshop Partnering IPE and Patient Safety Initiatives Using Simulation-Based Education. *MedEdPORTAL*. 2016;12:1-6.
8. Linskens EJ, Neu AE, Walz EJ, et al. Preparing for a foreign animal disease outbreak using a novel tabletop exercise. *Prehosp Disaster Med* 2018;33:640-6.
9. Chung S, Gardner AH, Schonfeld DJ, et al. Addressing children's needs in disasters: a regional pediatric tabletop exercise. *Disaster Med Public Health Prep* 2018;12(5):582-6.
10. Wexler B, Flamm A. Lessons learned from an active shooter full-scale functional exercise in a newly constructed emergency department. *Disaster Med Public Health Prep* 2017;11:522-5.

11. Savoia E, Biddinger PD, Fox P, Levin DE, Stone L, Stoto MA. Impact of tabletop exercises on participants' knowledge of and confidence in legal authorities for infectious disease emergencies. *Disaster Med Public Health Prep* 2009;3:104-10.
12. Evans C, Schwartz R. Using tabletop exercises as an innovative and practical teaching strategy in response to external disaster scenarios. *Nursing education perspectives* 2019;40:62-4.
13. Mackenzie C, Donohue J, Wasylina P, Cullum W, Hu P, Lam DM. How will military/civilian coordination work for reception of mass casualties from overseas? *Prehosp Disaster Med* 2009;24:380-8.
14. Hsu EB, Jenckes MW, Catlett CL, et al. Effectiveness of hospital staff mass-casualty incident training methods: a systematic literature review. *Prehosp Disaster Med* 2004;19:191-9.
15. Skryabina E, Reedy G, Amlôta R, Jaye P, Riley P. What is the value of health emergency preparedness exercises? A scoping review study. *Int J Disaster Risk Reduct* 2017;21:274-83.
16. Arksey H, O'Malley L. Scoping studies: towards a methodological framework. *Int J Soc Res Methodol* 2005;8:19-32.
17. Tricco AC, Lillie E, Zarin W, et al. PRISMA extension for scoping reviews (PRISMA-ScR): checklist and explanation. *Ann Intern Med* 2018;169:467-73.
18. Moher D, Liberati A, Tetzlaff J, et al. Preferred reporting items for systematic reviews and meta-analyses: the PRISMA statement. *BMJ* 2009;339:b2535.
19. Bradt D, Abraham K, Franks R. A strategic plan for disaster medicine in Australasia. *Emergency medicine*. 2003;15:271-82.
20. Kirkpatrick DL, Kirkpatrick JD. *Evaluating Training Programs*, 3rd ed. San Francisco, CA: Berrett-Koehler Publishers, 2006.
21. Shen N, Sockalingam S, Abi Jaoude A, et al. Scoping review protocol: education initiatives for medical psychiatry collaborative care. *BMJ Open* 2017;7:e015886.
22. Hawker S, Payne S, Kerr C, Hardey M, Powell J. Appraising the evidence: reviewing disparate data systematically. *Qual Health Res* 2002;12:1284-99.
23. Aromataris E, Munn Z. *Joanna Briggs Institute Reviewer's Manual*. The Joanna Briggs Institute. 2017. Available from <https://reviewersmanual.joannabriggs.org/>

## Preferred Reporting Items for Systematic reviews and Meta-Analyses extension for Scoping Reviews (PRISMA-ScR) Checklist

| SECTION                           | ITEM | PRISMA-ScR CHECKLIST ITEM                                                                                                                                                                                                                                                 | REPORTED ON PAGE # |
|-----------------------------------|------|---------------------------------------------------------------------------------------------------------------------------------------------------------------------------------------------------------------------------------------------------------------------------|--------------------|
| <b>TITLE</b>                      |      |                                                                                                                                                                                                                                                                           |                    |
| Title                             | 1    | Identify the report as a scoping review.                                                                                                                                                                                                                                  | 1                  |
| <b>ABSTRACT</b>                   |      |                                                                                                                                                                                                                                                                           |                    |
| Structured summary                | 2    | Provide a structured summary that includes (as applicable): background, objectives, eligibility criteria, sources of evidence, charting methods, results, and conclusions that relate to the review questions and objectives.                                             | 3                  |
| <b>INTRODUCTION</b>               |      |                                                                                                                                                                                                                                                                           |                    |
| Rationale                         | 3    | Describe the rationale for the review in the context of what is already known. Explain why the review questions/objectives lend themselves to a scoping review approach.                                                                                                  | 6                  |
| Objectives                        | 4    | Provide an explicit statement of the questions and objectives being addressed with reference to their key elements (e.g., population or participants, concepts, and context) or other relevant key elements used to conceptualize the review questions and/or objectives. | 6                  |
| <b>METHODS</b>                    |      |                                                                                                                                                                                                                                                                           |                    |
| Protocol and registration         | 5    | Indicate whether a review protocol exists; state if and where it can be accessed (e.g., a Web address); and if available, provide registration information, including the registration number.                                                                            | n/a                |
| Eligibility criteria              | 6    | Specify characteristics of the sources of evidence used as eligibility criteria (e.g., years considered, language, and publication status), and provide a rationale.                                                                                                      | 9                  |
| Information sources*              | 7    | Describe all information sources in the search (e.g., databases with dates of coverage and contact with authors to identify additional sources), as well as the date the most recent search was executed.                                                                 | 8-9                |
| Search                            | 8    | Present the full electronic search strategy for at least 1 database, including any limits used, such that it could be repeated.                                                                                                                                           | n/a                |
| Selection of sources of evidence† | 9    | State the process for selecting sources of evidence (i.e., screening and eligibility) included in the scoping review.                                                                                                                                                     | 8-9                |
| Data charting process‡            | 10   | Describe the methods of charting data from the included sources of evidence (e.g., calibrated forms or forms that have been tested by the team before their use, and whether data charting was done                                                                       | 10                 |

| SECTION                                               | ITEM | PRISMA-ScR CHECKLIST ITEM                                                                                                                                                                             | REPORTED ON PAGE # |
|-------------------------------------------------------|------|-------------------------------------------------------------------------------------------------------------------------------------------------------------------------------------------------------|--------------------|
|                                                       |      | independently or in duplicate) and any processes for obtaining and confirming data from investigators.                                                                                                |                    |
| Data items                                            | 11   | List and define all variables for which data were sought and any assumptions and simplifications made.                                                                                                | 11                 |
| Critical appraisal of individual sources of evidence§ | 12   | If done, provide a rationale for conducting a critical appraisal of included sources of evidence; describe the methods used and how this information was used in any data synthesis (if appropriate). | 11-12              |
| Synthesis of results                                  | 13   | Describe the methods of handling and summarizing the data that were charted.                                                                                                                          | 12                 |
| <b>RESULTS</b>                                        |      |                                                                                                                                                                                                       |                    |
| Selection of sources of evidence                      | 14   | Give numbers of sources of evidence screened, assessed for eligibility, and included in the review, with reasons for exclusions at each stage, ideally using a flow diagram.                          | n/a                |
| Characteristics of sources of evidence                | 15   | For each source of evidence, present characteristics for which data were charted and provide the citations.                                                                                           | n/a                |
| Critical appraisal within sources of evidence         | 16   | If done, present data on critical appraisal of included sources of evidence (see item 12).                                                                                                            | n/a                |
| Results of individual sources of evidence             | 17   | For each included source of evidence, present the relevant data that were charted that relate to the review questions and objectives.                                                                 | n/a                |
| Synthesis of results                                  | 18   | Summarize and/or present the charting results as they relate to the review questions and objectives.                                                                                                  | n/a                |
| <b>DISCUSSION</b>                                     |      |                                                                                                                                                                                                       |                    |
| Summary of evidence                                   | 19   | Summarize the main results (including an overview of concepts, themes, and types of evidence available), link to the review questions and objectives, and consider the relevance to key groups.       | 12-13              |
| Limitations                                           | 20   | Discuss the limitations of the scoping review process.                                                                                                                                                | n/a                |
| Conclusions                                           | 21   | Provide a general interpretation of the results with respect to the review questions and objectives, as well as potential implications and/or next steps.                                             | n/a                |
| <b>FUNDING</b>                                        |      |                                                                                                                                                                                                       |                    |
| Funding                                               | 22   | Describe sources of funding for the included sources of evidence, as well as sources of funding for the scoping review. Describe the role of the funders of the scoping review.                       | 14                 |

1  
2  
3  
4  
5  
6  
7  
8  
9  
10  
11  
12  
13  
14  
15  
16  
17  
18  
19  
20  
21  
22  
23  
24  
25  
26  
27  
28  
29  
30  
31  
32  
33  
34  
35  
36  
37  
38  
39  
40  
41  
42  
43  
44  
45  
46

JBI = Joanna Briggs Institute; PRISMA-ScR = Preferred Reporting Items for Systematic reviews and Meta-Analyses extension for Scoping Reviews.

\* Where *sources of evidence* (see second footnote) are compiled from, such as bibliographic databases, social media platforms, and Web sites.

† A more inclusive/heterogeneous term used to account for the different types of evidence or data sources (e.g., quantitative and/or qualitative research, expert opinion, and policy documents) that may be eligible in a scoping review as opposed to only studies. This is not to be confused with *information sources* (see first footnote).

‡ The frameworks by Arksey and O'Malley (6) and Levac and colleagues (7) and the JBI guidance (4, 5) refer to the process of data extraction in a scoping review as data charting.

§ The process of systematically examining research evidence to assess its validity, results, and relevance before using it to inform a decision. This term is used for items 12 and 19 instead of "risk of bias" (which is more applicable to systematic reviews of interventions) to include and acknowledge the various sources of evidence that may be used in a scoping review (e.g., quantitative and/or qualitative research, expert opinion, and policy document).

*From:* Tricco AC, Lillie E, Zarin W, O'Brien KK, Colquhoun H, Levac D, et al. PRISMA Extension for Scoping Reviews (PRISMA-ScR): Checklist and Explanation. *Ann Intern Med.* ;169:467–473. doi: 10.7326/M18-0850

For peer review only

# BMJ Open

## Use of tabletop exercises for healthcare education: a scoping review protocol

|                                 |                                                                                                                                                                                                                                                                                                                                                                                                                                                                                                                                                                                                                                                                                                                                                                                                                                                                                                                                       |
|---------------------------------|---------------------------------------------------------------------------------------------------------------------------------------------------------------------------------------------------------------------------------------------------------------------------------------------------------------------------------------------------------------------------------------------------------------------------------------------------------------------------------------------------------------------------------------------------------------------------------------------------------------------------------------------------------------------------------------------------------------------------------------------------------------------------------------------------------------------------------------------------------------------------------------------------------------------------------------|
| Journal:                        | <i>BMJ Open</i>                                                                                                                                                                                                                                                                                                                                                                                                                                                                                                                                                                                                                                                                                                                                                                                                                                                                                                                       |
| Manuscript ID                   | bmjopen-2019-032662.R2                                                                                                                                                                                                                                                                                                                                                                                                                                                                                                                                                                                                                                                                                                                                                                                                                                                                                                                |
| Article Type:                   | Protocol                                                                                                                                                                                                                                                                                                                                                                                                                                                                                                                                                                                                                                                                                                                                                                                                                                                                                                                              |
| Date Submitted by the Author:   | 02-Nov-2019                                                                                                                                                                                                                                                                                                                                                                                                                                                                                                                                                                                                                                                                                                                                                                                                                                                                                                                           |
| Complete List of Authors:       | Frégeau, Amélie; Hôpital du Sacré-Coeur de Montréal, Emergency medicine<br>Cournoyer, Alexis; Université de Montréal Faculté de médecine, ; Hôpital du Sacré-Coeur de Montréal, Department of Emergency Medicine<br>Maheu-Cadotte, Marc-André; Institut De Cardiologie de Montréal, ; Université de Montréal, Faculty of Nursing<br>Iseppon, Massimiliano; Hôpital Maisonneuve-Rosemont, Emergency medicine<br>Soucy, Nathalie; Centre Hospitalier de L'Université de Montréal, Direction of Education and of CHUM Academy<br>St-Cyr Bourque, Julie; Centre Hospitalier de L'Université de Montréal, Emergency medicine department<br>Cossette, Sylvie ; Montreal Heart Institute Research Centre, Research and International development<br>Castonguay, Véronique; Hôpital du Sacré-Coeur de Montréal, Emergency medicine department<br>Fleet, Richard; Université Laval, Département de médecine familiale et de médecine d'urgence |
| <b>Primary Subject Heading</b>: | Medical education and training                                                                                                                                                                                                                                                                                                                                                                                                                                                                                                                                                                                                                                                                                                                                                                                                                                                                                                        |
| Secondary Subject Heading:      | Communication, Emergency medicine, Intensive care, Public health, Qualitative research                                                                                                                                                                                                                                                                                                                                                                                                                                                                                                                                                                                                                                                                                                                                                                                                                                                |
| Keywords:                       | MEDICAL EDUCATION & TRAINING, ACCIDENT & EMERGENCY MEDICINE, HEALTH SERVICES ADMINISTRATION & MANAGEMENT, INTENSIVE & CRITICAL CARE, PRIMARY CARE, QUALITATIVE RESEARCH                                                                                                                                                                                                                                                                                                                                                                                                                                                                                                                                                                                                                                                                                                                                                               |
|                                 |                                                                                                                                                                                                                                                                                                                                                                                                                                                                                                                                                                                                                                                                                                                                                                                                                                                                                                                                       |

SCHOLARONE™  
Manuscripts

## Use of tabletop exercises for healthcare education: a scoping review protocol

Amélie Frégeau, Alexis Cournoyer, Marc-André Maheu-Cadotte, Massimiliano Iseppon, Nathalie Soucy, Julie St-Cyr Bourque, Sylvie Cossette, Véronique Castonguay and Richard Fleet

Amélie Frégeau, MD  
Faculty of Medicine, Université Laval, Québec, Canada  
Faculty of Medicine, Université de Montréal, Montreal, Canada

Alexis Cournoyer, MD  
Faculty of Medicine, Université de Montréal and Hôpital du Sacré-Cœur de Montréal  
Montreal, Canada

Marc-André Maheu-Cadotte, MSc  
Doctoral candidate, Faculty of Nursing, Université de Montréal, Montreal, Canada

Massimiliano Iseppon, MD  
Faculty of Medicine, Université de Montréal and Hôpital Maisonneuve-Rosemont  
Montreal, Canada

Nathalie Soucy, PhD  
Centre hospitalier de l'Université de Montréal, Montreal, Canada

Julie St-Cyr Bourque, MD  
Faculty of Medicine, Université de Montréal and Centre hospitalier de l'Université de Montréal  
Montreal, Canada

Sylvie Cossette, PhD  
Faculty of Nursing, Université de Montréal and Montreal Heart Institute Research Centre  
Montreal, Canada

Véronique Castonguay, MD, MA(Ed)  
Faculty of Medicine, Université de Montréal and Hôpital du Sacré-Coeur de Montréal  
Montreal, Canada

Richard Fleet, MD, PhD  
Faculty of Medicine, Université Laval and Hôpital Hôtel-Dieu de Lévis  
Quebec, Canada

Correspondence to:  
Amélie Frégeau  
[amelie.fregeau@umontreal.ca](mailto:amelie.fregeau@umontreal.ca)  
514-338-2222, ext. 3234



1  
2  
3 Fax: 514-228-3513  
4 Hôpital du Sacré-Coeur de Montréal  
5 5400 Boulevard Gouin Ouest, Door Z-1145  
6 H4J 1C5  
7 Montréal (Quebec)  
8 Canada  
9

10  
11 Word count: 2643  
12  
13  
14  
15  
16  
17  
18  
19  
20  
21  
22  
23  
24  
25  
26  
27  
28  
29  
30  
31  
32  
33  
34  
35  
36  
37  
38  
39  
40  
41  
42  
43  
44  
45  
46  
47  
48  
49  
50  
51  
52  
53  
54  
55  
56  
57  
58  
59  
60

For peer review only

## ABSTRACT

**Introduction:** There is a growing interest in developing interprofessional education (IPE) in the community of healthcare educators. Tabletop exercises (TTX) have been proposed as a mean to cultivate collaborative practice. A TTX simulates an emergent situation in an informal environment. Healthcare professionals need to take charge of this situation as a team through a discussion-based approach. As TTX are gaining in popularity, performing a review about their uses could guide educators and researchers. The aim of this scoping review is to map the uses of TTX in healthcare.

**Methods and analysis:** A search of the literature will be conducted using MeSH terms and keywords in PubMed, MEDLINE, EBM Reviews, CINAHL, EMBASE, and ERIC, along with a search of the grey literature. The search will be performed after the publication of this protocol (estimated to be December 1<sup>st</sup> 2019) and will be repeated one month prior to the submission for publication of the final review (estimated to be April 1<sup>st</sup> 2020). Studies reporting on TTX in healthcare and published in English or French will be included. Two reviewers will screen the articles and extract the data. The quality of the included articles will be assessed by two reviewers. To better map their uses, the varying TTX activities will be classified as performed in the context of disaster health or not, for IPE or not and using a board game or not. Moreover, following the same mapping objective, outcomes of TTX will be reported according to the Kirkpatrick Model of outcomes of educational programs.

**Ethics and dissemination:** No Institutional Review Board approval is required for this review. Results will be submitted for publication in a peer-reviewed journal. The findings of this review will inform future efforts to TTX into the training of healthcare professionals.

**Keywords:** medical education, tabletop exercises, healthcare, disaster health, training, simulation, interprofessional education

## STRENGTHS AND LIMITATIONS OF THIS STUDY

- The results of this study will be reported using a strategy based on the Preferred Reporting Items for Systematic Review and Meta-Analyses extension for Scoping Reviews (PRISMA-ScR) Checklist and the scoping methodological framework developed by Arksey and O'Malley.
- In addition to the standard requirements for scoping reviews, a formal quality assessment of included studies will be conducted using a checklist developed by Hawker and colleagues, as well as the JBI Critical Appraisal Checklist for Text and Opinion Papers.
- The study selection, the evaluation of the quality of the retained articles and data extraction will be performed by two independent reviewers to minimize the risk of bias or errors.
- The outcomes of each included study will also be reported according to the Kirkpatrick Model of outcomes of educational programs.
- The search strategy proposed here is broad, but one of its limitation is the exclusion of articles published in languages other than English or French.

## INTRODUCTION

Most serious errors in critical care occur because of poor communication or collaboration rather than individual mistakes.[1] Therefore, interest in interprofessional education (IPE) as a means to cultivate collaborative practice continues to grow among healthcare educators worldwide.[2-3] According to the Centre for the Advancement in Interprofessional Education (CAIPE), IPE occurs when “two or more professions learn with, from and about each other to improve collaboration and the quality of care”. [4] IPE aims to develop competencies of collaborative practice in healthcare professionals including role clarification, patient-centered care, teamwork, collaborative leadership, interprofessional communication and interpersonal conflict resolution.[5] Various pedagogical designs of IPE activities, such as tabletop exercises (TTX), have been used by healthcare educators to develop collaborative practice in healthcare professionals. [6-7]

A TTX is a facilitated group discussion that simulates an emergency situation in an informal, stress-free environment, sometimes using a board game format, and aims to strengthen readiness to manage a health emergency. TTX have been mostly used in disaster health to evaluate an organization’s preparedness to face a disaster and to educate healthcare professionals on their roles during the response.[8-13] By using TTX as a simulation tool, hospital administrators can assess whether professional roles and responsibilities throughout the response system are well understood and accomplished promptly.[14] TTX have also been used, to a lesser extent, in non-disaster health.[15-16]

No review has yet described the different uses of TTX. Hence, as TTX are gaining in popularity, performing a review about their uses is indicated. The aim of this scoping review is to map the uses of TTX in healthcare. Given the broad scope of this study, a scoping review methodology seems the best option as it aims “to examine the extent, range and nature of research activity. This type of rapid review might not describe research findings in any detail but is a useful way of mapping fields of study where it is difficult to visualize the range of material that might be available.”[17] In this scoping review, the various contexts in which TTX were used will be classified as in the field of disaster or non-disaster health, as an IPE or non-IPE exercise and whether or not they use a board game format. Moreover, an effort will be made to classify the reported outcomes of each selected study. The findings of this review will guide future research in this area and inform

1  
2  
3 healthcare educators and administrators who are considering or developing TTX in their  
4 institution.  
5  
6  
7

## 8 9 **METHODS**

10  
11 The protocol for this scoping review is based on Arksey & O'Malley's five-stage  
12 methodological framework statement and reported according to the Preferred Reporting  
13 Items for Systematic Review and Meta-Analyses extension for Scoping Reviews  
14 (PRISMA-ScR) Checklist.[17-19] The development of this protocol started in June 2018  
15 and publication of the review is estimated for April 2020.  
16  
17  
18  
19  
20

### 21 **Stage 1: Identifying the research question**

22  
23 This scoping review aims to report the uses of TTX in healthcare and their  
24 outcomes.  
25

#### 26 Definitions:

27  
28 Tabletop exercises are usually defined as a form of discussion-based activity that is  
29 guided by a facilitator. They usually involve a dialogue on the steps to take in response to  
30 a hypothetical scenario. Since there are various TTX designs, the definition that will be  
31 used in this scoping review is the following:  
32  
33  
34

35 *“A tabletop exercise is an exercise that uses a progressive simulated scenario to make*  
36 *participants consider the impact of a potential health emergency on existing plans,*  
37 *procedures and capacities. A TTX simulates an emergency situation in an informal, stress-*  
38 *free environment. The purpose of a TTX is to strengthen readiness to manage a health*  
39 *emergency, through facilitated group discussions.”[20]*  
40  
41  
42  
43  
44

45 The definition that will be used for disaster health is the following:

46  
47 *“Disaster medicine is defined as the study [of] prevention, preparedness, response and*  
48 *recovery from the health problems arising from disaster.”[21]*  
49

50 Contexts not attributed to the definition of disaster health will be classified as “non-disaster  
51 health”.  
52  
53

54  
55 The definition that will be used for IPE is the following:  
56  
57

1  
2  
3 *“When two or more professions learn with, from and about each other to improve*  
4 *collaboration and the quality of care”*.<sup>[4]</sup>

5  
6 Contexts not attributed to the definition of IPE will be classified as “non-IPE”.

7  
8  
9  
10 The definition that will be used for board game TTX is the following:

11 *“A board game TTX can be real or virtual. The board depicts a disaster scene or a*  
12 *healthcare setting. The participants move around symbol units (also called “movable*  
13 *markers”) which represent healthcare workers, patients and available resources to*  
14 *accomplish their duties.”*<sup>[12]</sup>

15  
16  
17  
18 Contexts not attributed to the definition of board game TTX will be classified as “non-  
19 board game TTX”.

20  
21  
22  
23  
24 Research question:

25 In addition to classifying contexts of TTX’s uses as pertaining to the field of disaster  
26 or non-disaster health, as an IPE or non-IPE exercise and whether or not they use a board  
27 game format, we plan to report the outcomes of each included study according to the  
28 Kirkpatrick Model of outcomes of educational programs.<sup>[22]</sup> This model determines  
29 aptitude from training and educational programs based on four levels of criteria: reaction,  
30 learning, behaviour, and organizational results. Generally, building an educational  
31 intervention that addresses higher levels of the Kirkpatrick Model and measures higher-  
32 level outcomes is more complex than building one that only addresses the lower levels.<sup>[22]</sup>  
33  
34  
35  
36  
37  
38  
39 Therefore, the following research questions will be addressed:

- 40  
41  
42  
43  
44  
45  
46  
47  
48  
49  
50  
51
- How have TTX been used in healthcare? More specifically, have they been used in the field of disaster or non-disaster health, as an IPE or non-IPE exercise and did they use a board game format?
  - What were the outcomes of the studies on tabletop exercises in healthcare according to the Kirkpatrick Model of outcomes of educational programs? Was a level of outcome more represented than another?

52 While the primary focus of this review is to sum up in which contexts tabletop  
53 exercises have been used in healthcare and their outcomes, we will also provide a narrative  
54  
55  
56  
57

1  
2  
3 review of the included studies regarding their design, setting, participants and  
4 interventions.  
5  
6

## 7 **Stage 2: Identifying relevant studies**

8  
9  
10 Eligible studies, abstracts and conference summaries will be identified through a  
11 comprehensive search of CINAHL, Embase, EBM Reviews, ERIC, MEDLINE, and  
12 PubMed, while the grey literature will be searched using various online platforms (e.g.,  
13 Google Scholar). For practical reasons, searches will be limited to articles in English and  
14 French. There will be no limit on publication date in order to generate as broad a picture  
15 as possible of educational interventions in healthcare using TTX.  
16  
17

18  
19  
20 The search strategy was collaboratively and iteratively developed with the  
21 assistance of a librarian. We were unable to identify a medical subject heading (MeSH)  
22 that was specific for tabletop exercises. Hence, we developed a search strategy for PubMed  
23 using keywords related to the following concepts: tabletop exercises, whiteboards with  
24 magnetic symbols, simulation, training, serious games, desktop and board game. Open and  
25 closed vocabulary were used to determine the best possible strategy. The search strategy  
26 was adapted to search the other online databases, and similar keywords were used to search  
27 the grey literature.  
28  
29

30  
31  
32 This search strategy was initially developed on July 24<sup>th</sup> 2018 and improved during  
33 the revision of this manuscript. We plan to perform the search as soon as the present  
34 manuscript is accepted for publication (estimated to be December 1<sup>st</sup> 2019) and we will  
35 repeat it one month prior to the submission for publication of the final review (estimated  
36 to be April 1<sup>st</sup> 2020) to ensure it is still up to date.  
37  
38  
39  
40  
41  
42  
43

## 44 **Stage 3: Study selection**

### 45 Inclusion criteria

46  
47 The eligibility of articles will be assessed based on the following inclusion criteria:

- 48 - The population of interest: healthcare professionals, including students in a  
49 healthcare program;
- 50 - The settings: academic and clinical settings where healthcare is provided or  
51 taught (e.g., university, hospital, clinics);  
52  
53  
54  
55  
56  
57

- The intervention: a tabletop exercise as a stand-alone intervention or as part of a multi-component intervention (e.g., combined with a workshop or a classroom-based learning activity);
- The outcome: at least one learning outcome from the Kirkpatrick Model (as previously described) is reported;
- Study design: all types of study designs (e.g., qualitative designs, quantitative designs and mixed methods designs) and methodologies including commentaries, case studies, descriptions of pedagogical innovations, conference summaries and viewpoint articles.

#### Exclusion criteria

- Scoping review and systematic review articles will be excluded.
- Studies published in a language other than English or French will be excluded.

EndNote (Version X9, Clarivate Analytics) will be used to import, manage, categorize, and upload all collected references during the screening and selection process. If we are unable to obtain the full text of an article, we will contact the corresponding author for the article in question; failure to respond will result in the exclusion of the study. The reference lists of all included studies will be screened to search for any additional relevant studies.

Two reviewers (AF, AC) will meet to discuss the criteria for inclusion and will then independently screen the titles and abstracts.

Following the initial selection process, the full text articles that are potentially relevant will be screened for eligibility by two reviewers (AF, MAMC). Any disagreements regarding study inclusion will be resolved through consensus. If consensus cannot be reached, a third reviewer (AC) will be consulted to resolve the disagreement. Reasons for excluding references at the full-text assessment stage of the screening process will be documented and reported in a PRISMA flow diagram.[19] The reviewers will meet again following full-text assessment to discuss any challenges and uncertainties related to study selection.

#### **Stage 4: Charting the data**



Two reviewers (AF, MAMC) will independently perform data extraction from studies included in the review. The research team has adapted a standardized charting form that was inspired by a protocol published by Shen et al.,[23] which was based on a similar research question that was applied to a different subject. This form was judged by members of our research team to be easy to use and relevant to our aims. The data charting domains and subdomains are described in Table 1.

**Table 1: Data charting domains and description of subdomains**

| Domain/subdomains          | Description                                                                                                                                                                                 |
|----------------------------|---------------------------------------------------------------------------------------------------------------------------------------------------------------------------------------------|
| <b>Article details</b>     |                                                                                                                                                                                             |
| Author                     | Last name and initials of the first author                                                                                                                                                  |
| Year                       | Publication year of the article                                                                                                                                                             |
| Country                    | Country where the study was performed                                                                                                                                                       |
| <b>Initiative details</b>  |                                                                                                                                                                                             |
| Context                    | What was the need to organize a TTX? Is it in the context of disaster health or of non-disaster health? Is it in the context of IPE or non-IPE? Were they using a board game format or not? |
| Setting                    | Where did the educational intervention take place (e.g., community, hospital, university)?                                                                                                  |
| Program delivery           | How was the program delivered (e.g., seminar, lecture, course, in-service training)?                                                                                                        |
| Instructors                | Who were the facilitators/instructors?                                                                                                                                                      |
| Program length             | How long did the program/intervention last?                                                                                                                                                 |
| <b>Study details</b>       |                                                                                                                                                                                             |
| Study design               | What was the study design?                                                                                                                                                                  |
| Participants               | Who were the study participants? What was the sample size?                                                                                                                                  |
| Intervention               | What was the intervention?                                                                                                                                                                  |
| Comparator                 | What was the comparator? (if applicable)                                                                                                                                                    |
| Study outcomes             | What did the authors identify as the study outcomes?                                                                                                                                        |
| <b>Kirkpatrick's level</b> |                                                                                                                                                                                             |
| Reaction                   | Did the intervention measure the immediate perception and attitude of the learner regarding the intervention?                                                                               |
| Learning                   | Did the intervention measure what was learned during the pedagogical intervention?                                                                                                          |
| Behaviour                  | Did the intervention measure if the learner applied the new knowledge in their daily life?                                                                                                  |
| Results                    | Did the intervention measure the organizational impact of daily use of the new knowledge at work by the learner?                                                                            |
| <b>Risk of bias</b>        |                                                                                                                                                                                             |
| Hawker checklist           | What is the score of the study? (if original study)                                                                                                                                         |
| JBI checklist              | What is the score of the study? (if editorial, opinion, or comment)                                                                                                                         |

Reviewers will pilot the charting form on five studies to determine whether this approach to data extraction is consistent with the research question and study purpose. Any relevant data that is not captured during the initial data extraction phase will be added

1  
2  
3 iteratively by adapting the chart. If there is unclear or missing data in an article, we will  
4 contact the corresponding author to obtain clarification or additional data.  
5

6  
7 Although an assessment of study quality is not mandatory for a scoping review, it  
8 is strongly recommended by Arksey & O'Malley's five-stage methodological framework  
9 statement.[17] We will assess the quality of included studies to more precisely describe the  
10 current evidence on TTX in healthcare and to formulate future-oriented advice that  
11 addresses methodological gaps identified in the literature. For original studies, study  
12 quality will be independently assessed by two reviewers (AF, MAMC) according to a  
13 checklist developed Hawker et al.[24] This tool was chosen because it has been validated  
14 to systematically review disparate data, whether qualitative or quantitative. For editorials,  
15 opinion texts and comments, we will assess quality using the validated JBI Critical  
16 Appraisal Checklist for Text and Opinion Papers.[25]  
17  
18  
19  
20  
21  
22  
23  
24  
25

### 26 **Stage 5: Collating, summarizing and reporting the results**

27 We will report data for each selected study including lead author, publication year,  
28 country, study context, setting, design, program delivery, program duration, participants,  
29 instructors, intervention, comparator (if applicable), and the outcomes. An effort will be  
30 made to report contexts of TTX according to three different characteristics:  
31  
32  
33

- 34 I. Disaster health or non-disaster health
  - 35 II. IPE or non-IPE
  - 36 III. Board game or non-board game format
- 37  
38  
39

40 This classification will facilitate the mapping of the current uses of TTX.  
41

42 Moreover, we will classify the outcomes using the Kirkpatrick Model of outcomes  
43 of educational programs for each study.[22] We will report on all levels of Kirkpatrick's  
44 Model, with special inquiry into the level that is most frequently represented among the  
45 studies included in the review.  
46  
47  
48

49 Finally, results of the quality assessment will be reported using a checklist  
50 developed by Hawker et al. for each original study, and using the JBI Critical Appraisal  
51 Checklist for Text and Opinion Papers for any editorials, opinion texts or comments  
52 included in the review.[24-25]  
53  
54  
55  
56  
57  
58  
59  
60

### **Patient and Public Involvement**

No patients involved.

### **ETHICS AND DISSEMINATION**

As this will be a scoping review of previously published studies, no ethics approval is required. The study findings will be submitted to an appropriate peer-reviewed journal.

### **DISCUSSION**

This scoping review will fill an important gap in the literature, as there are no existing reviews that exclusively focusses on mapping the use of TTX in healthcare settings. The results of this study will inform researchers, healthcare educators, clinicians, and administrators on the various uses of TTX in healthcare and more specifically in which contexts they are being used. Moreover, it will be possible to observe if the available literature focuses primarily on a single level of Kirkpatrick's model of outcome or ignores a particular level of outcome. These findings will be used to help develop and implement future educational programs involving TTX, with the hope that enhanced training of healthcare professionals will ultimately lead to improvements in patient, care, safety and satisfaction.

A limitation of this review is the exclusion of articles published in languages other than English or French.

### **AUTHOR CONTRIBUTIONS**

All authors contributed to the conception of the protocol. AF wrote the protocol. AC, MAMC, MI, NS, JSCB, SC, VC and RF critically revised the draft for important intellectual content. All authors have approved the final version of this submitted manuscript and agree to be accountable for all aspects related to this work.

## ACKNOWLEDGEMENTS

This research will be carried out as part of the of the first author's Masters thesis, for which she received scholarships from the following: Centre de recherche sur les soins et les services de première ligne de l'Université Laval from Université Laval.

The authors would like to thank Ms. Daniela Ziegler for helping with the design of the research methodology and Percipient Research & Consulting for their assistance with language editing.

## DATA SHARING

No additional data available.

## COPYRIGHT

The Corresponding Author has the right to grant on behalf of all authors and does grant on behalf of all authors, a worldwide licence to the Publishers and its licensees in perpetuity, in all forms, formats and media (whether known now or created in the future), to i) publish, reproduce, distribute, display and store the Contribution, ii) translate the Contribution into other languages, create adaptations, reprints, include within collections and create summaries, extracts and/or, abstracts of the Contribution, iii) create any other derivative work(s) based on the Contribution, iv) to exploit all subsidiary rights in the Contribution, v) the inclusion of electronic links from the Contribution to third party material where-ever it may be located; and, vi) licence any third party to do any or all of the above.

## COMPETING INTERESTS

All authors declare no support from any organization for the submitted work, no financial relationships with any organizations that might have an interest in the submitted work in the previous three years, and no other relationships or activities that could appear to have influenced the submitted work.

## TRANSPARENCY DECLARATION

The lead author (the manuscript's guarantor) affirms that the manuscript is an honest, accurate, and transparent account of the study being reported, that no important aspects of the study have been omitted, and that any discrepancies from the study as planned (and, if relevant, registered) have been explained.

## FUNDING

This work was supported by a \$2500 grant for research in primary care from Chaire du Docteur Sadok Besrouer de l'Université de Montréal and a \$5000 grant for research in primary care from Centre de recherche sur les soins et les services de première ligne de l'Université Laval (CERSSPL-UL) and the Centre universitaire intégré de soins et de services de première ligne (CIUSSS) de la Capitale-Nationale.

**REFERENCES**

1. Lehmann R, Seitz A, Meyburg J et al. CAEP Pediatric in-hospital emergencies: real life experiences, previous training and the need for training among physicians and nurses. *BMC Research Note*. 2019;12:1-7.
2. Lutfiyya MN, Chang LF, McGrath C, Lipsky MS. The state of the science of interprofessional collaborative practice: A scoping review of the patient health-related outcomes based literature published between 2010 and 2018. *PLoS One*. 2019;14:1-18.
3. Baird J, Ashland M, Rosenbluth G. Interprofessional Teams: Current Trends and Future Directions. *Pediatric Clinics of North America*. 2019;66:739-50.
4. Gum LF, Sweet L, Greenhill J, Prideaux D. Exploring interprofessional education and collaborative practice in Australian rural health services. *Journal of Interprofessional Care*. 2019;1-11.
5. Goldman J, Kitto S, Reeves S. Examining the implementation of collaborative competencies in a critical care setting: Key challenges for enacting competency-based education. *Journal of Interprofessional Care*. 2017;32:407-15
6. Danielson J, Willgerodt M. Building a Theoretically Grounded Curricular Framework for Successful Interprofessional Education. *American Journal of Pharmaceutical Education*. 2018;82:1133-9.
7. Wong A, Ruppel H, Gang M, Ng G. "The Safety Dance": A Faculty Development Workshop Partnering IPE and Patient Safety Initiatives Using Simulation-Based Education. *MedEdPORTAL*. 2016;12:1-6.
8. Linskens EJ, Neu AE, Walz EJ, et al. Preparing for a foreign animal disease outbreak using a novel tabletop exercise. *Prehosp Disaster Med* 2018;33:640-6.
9. Chung S, Gardner AH, Schonfeld DJ, et al. Addressing children's needs in disasters: a regional pediatric tabletop exercise. *Disaster Med Public Health Prep* 2018;12(5):582-6.
10. Wexler B, Flamm A. Lessons learned from an active shooter full-scale functional exercise in a newly constructed emergency department. *Disaster Med Public Health Prep* 2017;11:522-5.

11. Savoia E, Biddinger PD, Fox P, Levin DE, Stone L, Stoto MA. Impact of tabletop exercises on participants' knowledge of and confidence in legal authorities for infectious disease emergencies. *Disaster Med Public Health Prep* 2009;3:104-10.
12. Evans C, Schwartz R. Using tabletop exercises as an innovative and practical teaching strategy in response to external disaster scenarios. *Nursing education perspectives* 2019;40:62-4.
13. Skryabina E, Reedy G, Amlôta R, Jaye P, Riley P. What is the value of health emergency preparedness exercises? A scoping review study. *Int J Disaster Risk Reduct* 2017;21:274-83.
14. Mackenzie C, Donohue J, Wasylina P, Cullum W, Hu P, Lam DM. How will military/civilian coordination work for reception of mass casualties from overseas? *Prehosp Disaster Med* 2009;24:380-8.
15. Gordon DL, Issenberg SB, Gordon MS, et al. Stroke training of prehospital providers: an example of simulation-enhanced blended learning and evaluation. *Medical Teacher* 2005;27:114-21.
16. Moller TP, Munter KH, Ostergaard D, Fuhrmann L. Exploring challenges and solutions in the preparation of surgical patients. *Danish Medical Journal* 2015;62:A5141.
17. Arksey H, O'Malley L. Scoping studies: towards a methodological framework. *Int J Soc Res Methodol* 2005;8:19-32.
18. Tricco AC, Lillie E, Zarin W, et al. PRISMA extension for scoping reviews (PRISMA-ScR): checklist and explanation. *Ann Intern Med* 2018;169:467-73.
19. Moher D, Liberati A, Tetzlaff J, et al. Preferred reporting items for systematic reviews and meta-analyses: the PRISMA statement. *BMJ* 2009;339:b2535.
20. WHO Simulation Exercise Manual. Geneva: World Health Organization; 2017. Licence: CC BY-NC-SA 3.0 IGO.
21. Bradt D, Abraham K, Franks R. A strategic plan for disaster medicine in Australasia. *Emergency medicine*. 2003;15:271-82.
22. Kirkpatrick DL, Kirkpatrick JD. Evaluating Training Programs, 3rd ed. San Francisco, CA: Berrett-Koehler Publishers, 2006.
23. Shen N, Sockalingam S, Abi Jaoude A, et al. Scoping review protocol: education initiatives for medical psychiatry collaborative care. *BMJ Open* 2017;7:e015886.

- 1  
2  
3 24. Hawker S, Payne S, Kerr C, Hardey M, Powell J. Appraising the evidence: reviewing  
4 disparate data systematically. *Qual Health Res* 2002;12:1284-99.  
5  
6 25. Aromataris E, Munn Z. Joanna Briggs Institute Reviewer's Manual. The Joanna Briggs  
7 Institute. 2017. Available from <https://reviewersmanual.joannabriggs.org/>  
8  
9  
10  
11  
12  
13  
14  
15  
16  
17  
18  
19  
20  
21  
22  
23  
24  
25  
26  
27  
28  
29  
30  
31  
32  
33  
34  
35  
36  
37  
38  
39  
40  
41  
42  
43  
44  
45  
46  
47  
48  
49  
50  
51  
52  
53  
54  
55  
56  
57  
58  
59  
60

For peer review only



## Preferred Reporting Items for Systematic reviews and Meta-Analyses extension for Scoping Reviews (PRISMA-ScR) Checklist

| SECTION                           | ITEM | PRISMA-ScR CHECKLIST ITEM                                                                                                                                                                                                                                                 | REPORTED ON PAGE #                                              |
|-----------------------------------|------|---------------------------------------------------------------------------------------------------------------------------------------------------------------------------------------------------------------------------------------------------------------------------|-----------------------------------------------------------------|
| <b>TITLE</b>                      |      |                                                                                                                                                                                                                                                                           |                                                                 |
| Title                             | 1    | Identify the report as a scoping review.                                                                                                                                                                                                                                  | 1                                                               |
| <b>ABSTRACT</b>                   |      |                                                                                                                                                                                                                                                                           |                                                                 |
| Structured summary                | 2    | Provide a structured summary that includes (as applicable): background, objectives, eligibility criteria, sources of evidence, charting methods, results, and conclusions that relate to the review questions and objectives.                                             | 3                                                               |
| <b>INTRODUCTION</b>               |      |                                                                                                                                                                                                                                                                           |                                                                 |
| Rationale                         | 3    | Describe the rationale for the review in the context of what is already known. Explain why the review questions/objectives lend themselves to a scoping review approach.                                                                                                  | 5                                                               |
| Objectives                        | 4    | Provide an explicit statement of the questions and objectives being addressed with reference to their key elements (e.g., population or participants, concepts, and context) or other relevant key elements used to conceptualize the review questions and/or objectives. | 5                                                               |
| <b>METHODS</b>                    |      |                                                                                                                                                                                                                                                                           |                                                                 |
| Protocol and registration         | 5    | Indicate whether a review protocol exists; state if and where it can be accessed (e.g., a Web address); and if available, provide registration information, including the registration number.                                                                            | n/a                                                             |
| Eligibility criteria              | 6    | Specify characteristics of the sources of evidence used as eligibility criteria (e.g., years considered, language, and publication status), and provide a rationale.                                                                                                      | 8-9                                                             |
| Information sources*              | 7    | Describe all information sources in the search (e.g., databases with dates of coverage and contact with authors to identify additional sources), as well as the date the most recent search was executed.                                                                 | 8                                                               |
| Search                            | 8    | Present the full electronic search strategy for at least 1 database, including any limits used, such that it could be repeated.                                                                                                                                           | n/a<br>Reviewer 3 asked for removal of Supplementary Material I |
| Selection of sources of evidence† | 9    | State the process for selecting sources of evidence (i.e., screening and eligibility) included in the scoping review.                                                                                                                                                     | 9                                                               |

| SECTION                                               | ITEM | PRISMA-ScR CHECKLIST ITEM                                                                                                                                                                                                                                                                                  | REPORTED ON PAGE # |
|-------------------------------------------------------|------|------------------------------------------------------------------------------------------------------------------------------------------------------------------------------------------------------------------------------------------------------------------------------------------------------------|--------------------|
| Data charting process‡                                | 10   | Describe the methods of charting data from the included sources of evidence (e.g., calibrated forms or forms that have been tested by the team before their use, and whether data charting was done independently or in duplicate) and any processes for obtaining and confirming data from investigators. | 10                 |
| Data items                                            | 11   | List and define all variables for which data were sought and any assumptions and simplifications made.                                                                                                                                                                                                     | 10                 |
| Critical appraisal of individual sources of evidence§ | 12   | If done, provide a rationale for conducting a critical appraisal of included sources of evidence; describe the methods used and how this information was used in any data synthesis (if appropriate).                                                                                                      | 11                 |
| Synthesis of results                                  | 13   | Describe the methods of handling and summarizing the data that were charted.                                                                                                                                                                                                                               | 11                 |
| <b>RESULTS</b>                                        |      |                                                                                                                                                                                                                                                                                                            |                    |
| Selection of sources of evidence                      | 14   | Give numbers of sources of evidence screened, assessed for eligibility, and included in the review, with reasons for exclusions at each stage, ideally using a flow diagram.                                                                                                                               | n/a                |
| Characteristics of sources of evidence                | 15   | For each source of evidence, present characteristics for which data were charted and provide the citations.                                                                                                                                                                                                | n/a                |
| Critical appraisal within sources of evidence         | 16   | If done, present data on critical appraisal of included sources of evidence (see item 12).                                                                                                                                                                                                                 | n/a                |
| Results of individual sources of evidence             | 17   | For each included source of evidence, present the relevant data that were charted that relate to the review questions and objectives.                                                                                                                                                                      | n/a                |
| Synthesis of results                                  | 18   | Summarize and/or present the charting results as they relate to the review questions and objectives.                                                                                                                                                                                                       | n/a                |
| <b>DISCUSSION</b>                                     |      |                                                                                                                                                                                                                                                                                                            |                    |
| Summary of evidence                                   | 19   | Summarize the main results (including an overview of concepts, themes, and types of evidence available), link to the review questions and objectives, and consider the relevance to key groups.                                                                                                            | 12                 |
| Limitations                                           | 20   | Discuss the limitations of the scoping review process.                                                                                                                                                                                                                                                     | n/a                |
| Conclusions                                           | 21   | Provide a general interpretation of the results with respect to the review questions and objectives, as well as potential implications and/or next steps.                                                                                                                                                  | n/a                |

| SECTION        | ITEM | PRISMA-ScR CHECKLIST ITEM                                                                                                                                                       | REPORTED ON PAGE # |
|----------------|------|---------------------------------------------------------------------------------------------------------------------------------------------------------------------------------|--------------------|
| <b>FUNDING</b> |      |                                                                                                                                                                                 |                    |
| Funding        | 22   | Describe sources of funding for the included sources of evidence, as well as sources of funding for the scoping review. Describe the role of the funders of the scoping review. | 14                 |

JBI = Joanna Briggs Institute; PRISMA-ScR = Preferred Reporting Items for Systematic reviews and Meta-Analyses extension for Scoping Reviews.

\* Where *sources of evidence* (see second footnote) are compiled from, such as bibliographic databases, social media platforms, and Web sites.

† A more inclusive/heterogeneous term used to account for the different types of evidence or data sources (e.g., quantitative and/or qualitative research, expert opinion, and policy documents) that may be eligible in a scoping review as opposed to only studies. This is not to be confused with *information sources* (see first footnote).

‡ The frameworks by Arksey and O'Malley (6) and Levac and colleagues (7) and the JBI guidance (4, 5) refer to the process of data extraction in a scoping review as data charting.

§ The process of systematically examining research evidence to assess its validity, results, and relevance before using it to inform a decision. This term is used for items 12 and 19 instead of "risk of bias" (which is more applicable to systematic reviews of interventions) to include and acknowledge the various sources of evidence that may be used in a scoping review (e.g., quantitative and/or qualitative research, expert opinion, and policy document).

From: Tricco AC, Lillie E, Zarin W, O'Brien KK, Colquhoun H, Levac D, et al. PRISMA Extension for Scoping Reviews (PRISMA-ScR): Checklist and Explanation. *Ann Intern Med.* ;169:467–473. doi: 10.7326/M18-0850

## Preferred Reporting Items for Systematic reviews and Meta-Analyses extension for Scoping Reviews (PRISMA-ScR) Checklist

| SECTION                           | ITEM | PRISMA-ScR CHECKLIST ITEM                                                                                                                                                                                                                                                 | REPORTED ON PAGE # |
|-----------------------------------|------|---------------------------------------------------------------------------------------------------------------------------------------------------------------------------------------------------------------------------------------------------------------------------|--------------------|
| <b>TITLE</b>                      |      |                                                                                                                                                                                                                                                                           |                    |
| Title                             | 1    | Identify the report as a scoping review.                                                                                                                                                                                                                                  | 1                  |
| <b>ABSTRACT</b>                   |      |                                                                                                                                                                                                                                                                           |                    |
| Structured summary                | 2    | Provide a structured summary that includes (as applicable): background, objectives, eligibility criteria, sources of evidence, charting methods, results, and conclusions that relate to the review questions and objectives.                                             | 3                  |
| <b>INTRODUCTION</b>               |      |                                                                                                                                                                                                                                                                           |                    |
| Rationale                         | 3    | Describe the rationale for the review in the context of what is already known. Explain why the review questions/objectives lend themselves to a scoping review approach.                                                                                                  | 6                  |
| Objectives                        | 4    | Provide an explicit statement of the questions and objectives being addressed with reference to their key elements (e.g., population or participants, concepts, and context) or other relevant key elements used to conceptualize the review questions and/or objectives. | 6                  |
| <b>METHODS</b>                    |      |                                                                                                                                                                                                                                                                           |                    |
| Protocol and registration         | 5    | Indicate whether a review protocol exists; state if and where it can be accessed (e.g., a Web address); and if available, provide registration information, including the registration number.                                                                            | n/a                |
| Eligibility criteria              | 6    | Specify characteristics of the sources of evidence used as eligibility criteria (e.g., years considered, language, and publication status), and provide a rationale.                                                                                                      | 9                  |
| Information sources*              | 7    | Describe all information sources in the search (e.g., databases with dates of coverage and contact with authors to identify additional sources), as well as the date the most recent search was executed.                                                                 | 8-9                |
| Search                            | 8    | Present the full electronic search strategy for at least 1 database, including any limits used, such that it could be repeated.                                                                                                                                           | n/a                |
| Selection of sources of evidence† | 9    | State the process for selecting sources of evidence (i.e., screening and eligibility) included in the scoping review.                                                                                                                                                     | 8-9                |
| Data charting process‡            | 10   | Describe the methods of charting data from the included sources of evidence (e.g., calibrated forms or forms that have been tested by the team before their use, and whether data charting was done                                                                       | 10                 |

| SECTION                                               | ITEM | PRISMA-ScR CHECKLIST ITEM                                                                                                                                                                             | REPORTED ON PAGE # |
|-------------------------------------------------------|------|-------------------------------------------------------------------------------------------------------------------------------------------------------------------------------------------------------|--------------------|
|                                                       |      | independently or in duplicate) and any processes for obtaining and confirming data from investigators.                                                                                                |                    |
| Data items                                            | 11   | List and define all variables for which data were sought and any assumptions and simplifications made.                                                                                                | 11                 |
| Critical appraisal of individual sources of evidence§ | 12   | If done, provide a rationale for conducting a critical appraisal of included sources of evidence; describe the methods used and how this information was used in any data synthesis (if appropriate). | 11-12              |
| Synthesis of results                                  | 13   | Describe the methods of handling and summarizing the data that were charted.                                                                                                                          | 12                 |
| <b>RESULTS</b>                                        |      |                                                                                                                                                                                                       |                    |
| Selection of sources of evidence                      | 14   | Give numbers of sources of evidence screened, assessed for eligibility, and included in the review, with reasons for exclusions at each stage, ideally using a flow diagram.                          | n/a                |
| Characteristics of sources of evidence                | 15   | For each source of evidence, present characteristics for which data were charted and provide the citations.                                                                                           | n/a                |
| Critical appraisal within sources of evidence         | 16   | If done, present data on critical appraisal of included sources of evidence (see item 12).                                                                                                            | n/a                |
| Results of individual sources of evidence             | 17   | For each included source of evidence, present the relevant data that were charted that relate to the review questions and objectives.                                                                 | n/a                |
| Synthesis of results                                  | 18   | Summarize and/or present the charting results as they relate to the review questions and objectives.                                                                                                  | n/a                |
| <b>DISCUSSION</b>                                     |      |                                                                                                                                                                                                       |                    |
| Summary of evidence                                   | 19   | Summarize the main results (including an overview of concepts, themes, and types of evidence available), link to the review questions and objectives, and consider the relevance to key groups.       | 12-13              |
| Limitations                                           | 20   | Discuss the limitations of the scoping review process.                                                                                                                                                | n/a                |
| Conclusions                                           | 21   | Provide a general interpretation of the results with respect to the review questions and objectives, as well as potential implications and/or next steps.                                             | n/a                |
| <b>FUNDING</b>                                        |      |                                                                                                                                                                                                       |                    |
| Funding                                               | 22   | Describe sources of funding for the included sources of evidence, as well as sources of funding for the scoping review. Describe the role of the funders of the scoping review.                       | 14                 |

1  
2  
3  
4  
5  
6  
7  
8  
9  
10  
11  
12  
13  
14  
15  
16  
17  
18  
19  
20  
21  
22  
23  
24  
25  
26  
27  
28  
29  
30  
31  
32  
33  
34  
35  
36  
37  
38  
39  
40  
41  
42  
43  
44  
45  
46

JBI = Joanna Briggs Institute; PRISMA-ScR = Preferred Reporting Items for Systematic reviews and Meta-Analyses extension for Scoping Reviews.

\* Where *sources of evidence* (see second footnote) are compiled from, such as bibliographic databases, social media platforms, and Web sites.

† A more inclusive/heterogeneous term used to account for the different types of evidence or data sources (e.g., quantitative and/or qualitative research, expert opinion, and policy documents) that may be eligible in a scoping review as opposed to only studies. This is not to be confused with *information sources* (see first footnote).

‡ The frameworks by Arksey and O'Malley (6) and Levac and colleagues (7) and the JBI guidance (4, 5) refer to the process of data extraction in a scoping review as data charting.

§ The process of systematically examining research evidence to assess its validity, results, and relevance before using it to inform a decision. This term is used for items 12 and 19 instead of "risk of bias" (which is more applicable to systematic reviews of interventions) to include and acknowledge the various sources of evidence that may be used in a scoping review (e.g., quantitative and/or qualitative research, expert opinion, and policy document).

*From:* Tricco AC, Lillie E, Zarin W, O'Brien KK, Colquhoun H, Levac D, et al. PRISMA Extension for Scoping Reviews (PRISMA-ScR): Checklist and Explanation. *Ann Intern Med.* ;169:467–473. doi: 10.7326/M18-0850

For peer review only

# BMJ Open

## Use of tabletop exercises for healthcare education: a scoping review protocol

|                                 |                                                                                                                                                                                                                                                                                                                                                                                                                                                                                                                                                                                                                                                                                                                                                                                                                                                                                                                                       |
|---------------------------------|---------------------------------------------------------------------------------------------------------------------------------------------------------------------------------------------------------------------------------------------------------------------------------------------------------------------------------------------------------------------------------------------------------------------------------------------------------------------------------------------------------------------------------------------------------------------------------------------------------------------------------------------------------------------------------------------------------------------------------------------------------------------------------------------------------------------------------------------------------------------------------------------------------------------------------------|
| Journal:                        | <i>BMJ Open</i>                                                                                                                                                                                                                                                                                                                                                                                                                                                                                                                                                                                                                                                                                                                                                                                                                                                                                                                       |
| Manuscript ID                   | bmjopen-2019-032662.R3                                                                                                                                                                                                                                                                                                                                                                                                                                                                                                                                                                                                                                                                                                                                                                                                                                                                                                                |
| Article Type:                   | Protocol                                                                                                                                                                                                                                                                                                                                                                                                                                                                                                                                                                                                                                                                                                                                                                                                                                                                                                                              |
| Date Submitted by the Author:   | 12-Dec-2019                                                                                                                                                                                                                                                                                                                                                                                                                                                                                                                                                                                                                                                                                                                                                                                                                                                                                                                           |
| Complete List of Authors:       | Frégeau, Amélie; Hôpital du Sacré-Coeur de Montréal, Emergency medicine<br>Cournoyer, Alexis; Université de Montréal Faculté de médecine, ; Hôpital du Sacré-Coeur de Montréal, Department of Emergency Medicine<br>Maheu-Cadotte, Marc-André; Institut De Cardiologie de Montréal, ; Université de Montréal, Faculty of Nursing<br>Iseppon, Massimiliano; Hôpital Maisonneuve-Rosemont, Emergency medicine<br>Soucy, Nathalie; Centre Hospitalier de L'Université de Montréal, Direction of Education and of CHUM Academy<br>St-Cyr Bourque, Julie; Centre Hospitalier de L'Université de Montréal, Emergency medicine department<br>Cossette, Sylvie ; Montreal Heart Institute Research Centre, Research and International development<br>Castonguay, Véronique; Hôpital du Sacré-Coeur de Montréal, Emergency medicine department<br>Fleet, Richard; Université Laval, Département de médecine familiale et de médecine d'urgence |
| <b>Primary Subject Heading</b>: | Medical education and training                                                                                                                                                                                                                                                                                                                                                                                                                                                                                                                                                                                                                                                                                                                                                                                                                                                                                                        |
| Secondary Subject Heading:      | Communication, Emergency medicine, Intensive care, Public health, Qualitative research                                                                                                                                                                                                                                                                                                                                                                                                                                                                                                                                                                                                                                                                                                                                                                                                                                                |
| Keywords:                       | MEDICAL EDUCATION & TRAINING, ACCIDENT & EMERGENCY MEDICINE, HEALTH SERVICES ADMINISTRATION & MANAGEMENT, INTENSIVE & CRITICAL CARE, PRIMARY CARE, QUALITATIVE RESEARCH                                                                                                                                                                                                                                                                                                                                                                                                                                                                                                                                                                                                                                                                                                                                                               |
|                                 |                                                                                                                                                                                                                                                                                                                                                                                                                                                                                                                                                                                                                                                                                                                                                                                                                                                                                                                                       |

SCHOLARONE™  
Manuscripts

## Use of tabletop exercises for healthcare education: a scoping review protocol

Amélie Frégeau, Alexis Cournoyer, Marc-André Maheu-Cadotte, Massimiliano Iseppon, Nathalie Soucy, Julie St-Cyr Bourque, Sylvie Cossette, Véronique Castonguay and Richard Fleet

Amélie Frégeau, MD  
Faculty of Medicine, Université Laval, Québec, Canada  
Faculty of Medicine, Université de Montréal, Montreal, Canada

Alexis Cournoyer, MD  
Faculty of Medicine, Université de Montréal and Hôpital du Sacré-Cœur de Montréal  
Montreal, Canada

Marc-André Maheu-Cadotte, MSc  
Doctoral candidate, Faculty of Nursing, Université de Montréal, Montreal, Canada

Massimiliano Iseppon, MD  
Faculty of Medicine, Université de Montréal and Hôpital Maisonneuve-Rosemont  
Montreal, Canada

Nathalie Soucy, PhD  
Centre hospitalier de l'Université de Montréal, Montreal, Canada

Julie St-Cyr Bourque, MD  
Faculty of Medicine, Université de Montréal and Centre hospitalier de l'Université de Montréal  
Montreal, Canada

Sylvie Cossette, PhD  
Faculty of Nursing, Université de Montréal and Montreal Heart Institute Research Centre  
Montreal, Canada

Véronique Castonguay, MD, MA(Ed)  
Faculty of Medicine, Université de Montréal and Hôpital du Sacré-Coeur de Montréal  
Montreal, Canada

Richard Fleet, MD, PhD  
Faculty of Medicine, Université Laval and Hôpital Hôtel-Dieu de Lévis  
Quebec, Canada

Correspondence to:  
Amélie Frégeau  
[amelie.fregeau@umontreal.ca](mailto:amelie.fregeau@umontreal.ca)  
514-338-2222, ext. 3234



1  
2  
3 Fax: 514-228-3513  
4 Hôpital du Sacré-Coeur de Montréal  
5 5400 Boulevard Gouin Ouest, Door Z-1145  
6 H4J 1C5  
7 Montréal (Quebec)  
8 Canada  
9

10  
11 Word count: 2664  
12  
13  
14  
15  
16  
17  
18  
19  
20  
21  
22  
23  
24  
25  
26  
27  
28  
29  
30  
31  
32  
33  
34  
35  
36  
37  
38  
39  
40  
41  
42  
43  
44  
45  
46  
47  
48  
49  
50  
51  
52  
53  
54  
55  
56  
57  
58  
59  
60

For peer review only

## ABSTRACT

**Introduction:** There is a growing interest in developing interprofessional education (IPE) in the community of healthcare educators. Tabletop exercises (TTX) have been proposed as a mean to cultivate collaborative practice. A TTX simulates an emergent situation in an informal environment. Healthcare professionals need to take charge of this situation as a team through a discussion-based approach. As TTX are gaining in popularity, performing a review about their uses could guide educators and researchers. The aim of this scoping review is to map the uses of TTX in healthcare.

**Methods and analysis:** A search of the literature will be conducted using MeSH terms and keywords in PubMed, MEDLINE, EBM Reviews, CINAHL, EMBASE, and ERIC, along with a search of the grey literature. The search will be performed after the publication of this protocol (estimated to be January 1<sup>st</sup> 2020) and will be repeated one month prior to the submission for publication of the final review (estimated to be June 1<sup>st</sup> 2020). Studies reporting on TTX in healthcare and published in English or French will be included. Two reviewers will screen the articles and extract the data. The quality of the included articles will be assessed by two reviewers. To better map their uses, the varying TTX activities will be classified as performed in the context of disaster health or not, for IPE or not and using a board game or not. Moreover, following the same mapping objective, outcomes of TTX will be reported according to the Kirkpatrick Model of outcomes of educational programs.

**Ethics and dissemination:** No Institutional Review Board approval is required for this review. Results will be submitted for publication in a peer-reviewed journal. The findings of this review will inform future efforts to TTX into the training of healthcare professionals.

**Keywords:** medical education, tabletop exercises, healthcare, disaster health, training, simulation, interprofessional education

## STRENGTHS AND LIMITATIONS OF THIS STUDY

- The results of this study will be reported using a strategy based on the Preferred Reporting Items for Systematic Review and Meta-Analyses extension for Scoping Reviews (PRISMA-ScR) Checklist and the scoping methodological framework developed by Arksey and O'Malley.
- In addition to the standard requirements for scoping reviews, a formal quality assessment of included studies will be conducted using a checklist developed by Hawker and colleagues, as well as the JBI Critical Appraisal Checklist for Text and Opinion Papers.
- The study selection, the evaluation of the quality of the retained articles and data extraction will be performed by two independent reviewers to minimize the risk of bias or errors.
- The outcomes of each included study will also be reported according to the Kirkpatrick Model of outcomes of educational programs.
- The search strategy proposed here is broad, but one of its limitation is the exclusion of articles published in languages other than English or French.

## INTRODUCTION

Most serious errors in critical care occur because of poor communication or collaboration rather than individual mistakes.[1] Therefore, interest in interprofessional education (IPE) as a means to cultivate collaborative practice continues to grow among healthcare educators worldwide.[2-3] According to the Centre for the Advancement in Interprofessional Education (CAIPE), IPE occurs when “two or more professions learn with, from and about each other to improve collaboration and the quality of care”. [4] IPE aims to develop competencies of collaborative practice in healthcare professionals including role clarification, patient-centered care, teamwork, collaborative leadership, interprofessional communication and interpersonal conflict resolution.[5] Various pedagogical designs of IPE activities, such as tabletop exercises (TTX), have been used by healthcare educators to develop collaborative practice in healthcare professionals. [6-7]

A TTX is a facilitated group discussion that simulates an emergency situation in an informal, stress-free environment, sometimes using a board game format, and aims to strengthen readiness to manage a health emergency. TTX have been mostly used in disaster health to evaluate an organization’s preparedness to face a disaster and to educate healthcare professionals on their roles during the response.[8-13] By using TTX as a simulation tool, hospital administrators can assess whether professional roles and responsibilities throughout the response system are well understood and accomplished promptly.[14] TTX have also been used, to a lesser extent, in non-disaster health.[15-16]

No review has yet described the different uses of TTX. Hence, as TTX are gaining in popularity, performing a review about their uses is indicated. The aim of this scoping review is to map the uses of TTX in healthcare. Given the broad scope of this study, a scoping review methodology seems the best option as it aims “to examine the extent, range and nature of research activity. This type of rapid review might not describe research findings in any detail but is a useful way of mapping fields of study where it is difficult to visualize the range of material that might be available.”[17] In this scoping review, the various contexts in which TTX were used will be classified as in the field of disaster or non-disaster health, as an IPE or non-IPE exercise and whether or not they use a board game format. Moreover, an effort will be made to classify the reported outcomes of each selected study. The findings of this review will guide future research in this area and inform

1  
2  
3 healthcare educators and administrators who are considering or developing TTX in their  
4 institution.  
5  
6  
7

## 8 9 **METHODS**

10 The protocol for this scoping review is based on Arksey & O'Malley's five-stage  
11 methodological framework statement and reported according to the Preferred Reporting  
12 Items for Systematic Review and Meta-Analyses extension for Scoping Reviews  
13 (PRISMA-ScR) Checklist.[17-19] The development of this protocol started in June 2018  
14 and publication of the review is estimated for June 1<sup>st</sup> 2020.  
15  
16  
17  
18  
19  
20

### 21 **Stage 1: Identifying the research question**

22 This scoping review aims to report the uses of TTX in healthcare and their  
23 outcomes.  
24  
25

#### 26 Definitions:

27 Tabletop exercises are usually defined as a form of discussion-based activity that is  
28 guided by a facilitator. They usually involve a dialogue on the steps to take in response to  
29 a hypothetical scenario. Since there are various TTX designs, the definition that will be  
30 used in this scoping review is the following:  
31  
32  
33  
34

35 *“A tabletop exercise is an exercise that uses a progressive simulated scenario to make*  
36 *participants consider the impact of a potential health emergency on existing plans,*  
37 *procedures and capacities. A TTX simulates an emergency situation in an informal, stress-*  
38 *free environment. The purpose of a TTX is to strengthen readiness to manage a health*  
39 *emergency, through facilitated group discussions.”[20]*  
40  
41  
42  
43  
44

45 The definition that will be used for disaster health is the following:

46 *“Disaster medicine is defined as the study [of] prevention, preparedness, response and*  
47 *recovery from the health problems arising from disaster.”[21]*  
48  
49

50 Contexts not attributed to the definition of disaster health will be classified as “non-disaster  
51 health”.  
52  
53  
54

55 The definition that will be used for IPE is the following:  
56  
57  
58  
59  
60

1  
2  
3 *“When two or more professions learn with, from and about each other to improve*  
4 *collaboration and the quality of care”*.<sup>[4]</sup>

5  
6 Contexts not attributed to the definition of IPE will be classified as “non-IPE”.

7  
8  
9  
10 The definition that will be used for board game TTX is the following:

11 *“A board game TTX can be real or virtual. The board depicts a disaster scene or a*  
12 *healthcare setting. The participants move around symbol units (also called “movable*  
13 *markers”) which represent healthcare workers, patients and available resources to*  
14 *accomplish their duties.”*<sup>[12]</sup>

15  
16  
17  
18 Contexts not attributed to the definition of board game TTX will be classified as “non-  
19 board game TTX”.

20  
21  
22  
23  
24 Research question:

25 In addition to classifying contexts of TTX’s uses as pertaining to the field of disaster  
26 or non-disaster health, as an IPE or non-IPE exercise and whether or not they use a board  
27 game format, we plan to report the outcomes of each included study according to the  
28 Kirkpatrick Model of outcomes of educational programs.<sup>[22]</sup> This model determines  
29 aptitude from training and educational programs based on four levels of criteria: reaction,  
30 learning, behaviour, and organizational results. Generally, building an educational  
31 intervention that addresses higher levels of the Kirkpatrick Model and measures higher-  
32 level outcomes is more complex than building one that only addresses the lower levels.<sup>[22]</sup>  
33 Therefore, the following research questions will be addressed:

- 34  
35  
36  
37  
38  
39  
40  
41  
42  
43  
44  
45  
46  
47  
48  
49  
50  
51
- How have TTX been used in healthcare? More specifically, have they been used in the field of disaster or non-disaster health, as an IPE or non-IPE exercise and did they use a board game format?
  - What were the outcomes of the studies on tabletop exercises in healthcare according to the Kirkpatrick Model of outcomes of educational programs? Was a level of outcome more represented than another?

52 While the primary focus of this review is to sum up in which contexts tabletop  
53 exercises have been used in healthcare and their outcomes, we will also provide a narrative  
54 review of the included studies regarding their design, setting, participants and  
55  
56  
57

1  
2  
3 interventions. If ever some contexts of use of TTX not identified beforehand emerge during  
4 the review process, they will be added iteratively.  
5  
6

## 7 **Stage 2: Identifying relevant studies**

8  
9  
10 Eligible studies, abstracts and conference summaries will be identified through a  
11 comprehensive search of CINAHL, Embase, EBM Reviews, ERIC, MEDLINE, and  
12 PubMed, while the grey literature will be searched using various online platforms (e.g.,  
13 Google Scholar). For practical reasons, searches will be limited to articles in English and  
14 French. There will be no limit on publication date in order to generate as broad a picture  
15 as possible of educational interventions in healthcare using TTX.  
16  
17

18  
19  
20 The search strategy was collaboratively and iteratively developed with the  
21 assistance of a librarian. We were unable to identify a medical subject heading (MeSH)  
22 that was specific for tabletop exercises. Hence, we developed a search strategy for PubMed  
23 using keywords related to the following concepts: tabletop exercises, whiteboards with  
24 magnetic symbols, simulation, training, serious games, desktop and board game. Open and  
25 closed vocabulary were used to determine the best possible strategy. The search strategy  
26 was adapted to search the other online databases, and similar keywords were used to search  
27 the grey literature.  
28  
29

30  
31  
32 This search strategy was initially developed on July 24<sup>th</sup> 2018 and improved during  
33 the revision of this manuscript. We plan to perform the search as soon as the present  
34 manuscript is accepted for publication (estimated to be January 1<sup>st</sup> 2020) and we will repeat  
35 it one month prior to the submission for publication of the final review (estimated to be  
36 June 1<sup>st</sup> 2020) to ensure it is still up to date.  
37  
38  
39  
40  
41  
42  
43

## 44 **Stage 3: Study selection**

### 45 Inclusion criteria

46  
47 The eligibility of articles will be assessed based on the following inclusion criteria:

- 48 - The population of interest: healthcare professionals, including students in a  
49 healthcare program;
- 50 - The settings: academic and clinical settings where healthcare is provided or  
51 taught (e.g., university, hospital, clinics);  
52  
53  
54  
55  
56  
57

- The intervention: a tabletop exercise as a stand-alone intervention or as part of a multi-component intervention (e.g., combined with a workshop or a classroom-based learning activity);
- The outcome: at least one learning outcome from the Kirkpatrick Model (as previously described) is reported;
- Study design: all types of study designs (e.g., qualitative designs, quantitative designs and mixed methods designs) and methodologies including commentaries, case studies, descriptions of pedagogical innovations, conference summaries and viewpoint articles.

#### Exclusion criteria

- Scoping review and systematic review articles will be excluded.
- Studies published in a language other than English or French will be excluded.

EndNote (Version X9, Clarivate Analytics) will be used to import, manage, categorize, and upload all collected references during the screening and selection process. If we are unable to obtain the full text of an article, we will contact the corresponding author for the article in question; failure to respond will result in the exclusion of the study. The reference lists of all included studies will be screened to search for any additional relevant studies.

Two reviewers (AF, AC) will meet to discuss the criteria for inclusion and will then independently screen the titles and abstracts.

Following the initial selection process, the full text articles that are potentially relevant will be screened for eligibility by two reviewers (AF, MAMC). Any disagreements regarding study inclusion will be resolved through consensus. If consensus cannot be reached, a third reviewer (AC) will be consulted to resolve the disagreement. Reasons for excluding references at the full-text assessment stage of the screening process will be documented and reported in a PRISMA flow diagram.[19] The reviewers will meet again following full-text assessment to discuss any challenges and uncertainties related to study selection.

#### **Stage 4: Charting the data**



Two reviewers (AF, MAMC) will independently perform data extraction from studies included in the review. The research team has adapted a standardized charting form that was inspired by a protocol published by Shen et al.,[23] which was based on a similar research question that was applied to a different subject. This form was judged by members of our research team to be easy to use and relevant to our aims. The data charting domains and subdomains are described in Table 1.

**Table 1: Data charting domains and description of subdomains**

| Domain/subdomains          | Description                                                                                                                                                                                 |
|----------------------------|---------------------------------------------------------------------------------------------------------------------------------------------------------------------------------------------|
| <b>Article details</b>     |                                                                                                                                                                                             |
| Author                     | Last name and initials of the first author                                                                                                                                                  |
| Year                       | Publication year of the article                                                                                                                                                             |
| Country                    | Country where the study was performed                                                                                                                                                       |
| <b>Initiative details</b>  |                                                                                                                                                                                             |
| Context                    | What was the need to organize a TTX? Is it in the context of disaster health or of non-disaster health? Is it in the context of IPE or non-IPE? Were they using a board game format or not? |
| Setting                    | Where did the educational intervention take place (e.g., community, hospital, university)?                                                                                                  |
| Program delivery           | How was the program delivered (e.g., seminar, lecture, course, in-service training)?                                                                                                        |
| Instructors                | Who were the facilitators/instructors?                                                                                                                                                      |
| Program length             | How long did the program/intervention last?                                                                                                                                                 |
| <b>Study details</b>       |                                                                                                                                                                                             |
| Study design               | What was the study design?                                                                                                                                                                  |
| Participants               | Who were the study participants? What was the sample size?                                                                                                                                  |
| Intervention               | What was the intervention?                                                                                                                                                                  |
| Comparator                 | What was the comparator? (if applicable)                                                                                                                                                    |
| Study outcomes             | What did the authors identify as the study outcomes?                                                                                                                                        |
| <b>Kirkpatrick's level</b> |                                                                                                                                                                                             |
| Reaction                   | Did the intervention measure the immediate perception and attitude of the learner regarding the intervention?                                                                               |
| Learning                   | Did the intervention measure what was learned during the pedagogical intervention?                                                                                                          |
| Behaviour                  | Did the intervention measure if the learner applied the new knowledge in their daily life?                                                                                                  |
| Results                    | Did the intervention measure the organizational impact of daily use of the new knowledge at work by the learner?                                                                            |
| <b>Risk of bias</b>        |                                                                                                                                                                                             |
| Hawker checklist           | What is the score of the study? (if original study)                                                                                                                                         |
| JBI checklist              | What is the score of the study? (if editorial, opinion, or comment)                                                                                                                         |

Reviewers will pilot the charting form on five studies to determine whether this approach to data extraction is consistent with the research question and study purpose. Any relevant data that is not captured during the initial data extraction phase will be added

1  
2  
3 iteratively by adapting the chart. If there is unclear or missing data in an article, we will  
4 contact the corresponding author to obtain clarification or additional data.  
5

6 Although an assessment of study quality is not mandatory for a scoping review, it  
7 is strongly recommended by Arksey & O'Malley's five-stage methodological framework  
8 statement.[17] We will assess the quality of included studies to more precisely describe the  
9 current evidence on TTX in healthcare and to formulate future-oriented advice that  
10 addresses methodological gaps identified in the literature. For original studies, study  
11 quality will be independently assessed by two reviewers (AF, MAMC) according to a  
12 checklist developed Hawker et al.[24] This tool was chosen because it has been validated  
13 to systematically review disparate data, whether qualitative or quantitative. For editorials,  
14 opinion texts and comments, we will assess quality using the validated JBI Critical  
15 Appraisal Checklist for Text and Opinion Papers.[25]  
16  
17  
18  
19  
20  
21  
22  
23  
24  
25

### 26 **Stage 5: Collating, summarizing and reporting the results**

27 We will report data for each selected study including lead author, publication year,  
28 country, study context, setting, design, program delivery, program duration, participants,  
29 instructors, intervention, comparator (if applicable), and the outcomes. An effort will be  
30 made to report contexts of TTX according to three different characteristics:  
31  
32  
33

- 34 I. Disaster health or non-disaster health
  - 35 II. IPE or non-IPE
  - 36 III. Board game or non-board game format
- 37  
38  
39

40 This classification will facilitate the mapping of the current uses of TTX.

41  
42 Moreover, we will classify the outcomes using the Kirkpatrick Model of outcomes  
43 of educational programs for each study.[22] We will report on all levels of Kirkpatrick's  
44 Model, with special inquiry into the level that is most frequently represented among the  
45 studies included in the review.  
46  
47  
48

49 Finally, results of the quality assessment will be reported using a checklist  
50 developed by Hawker et al. for each original study, and using the JBI Critical Appraisal  
51 Checklist for Text and Opinion Papers for any editorials, opinion texts or comments  
52 included in the review.[24-25]  
53  
54  
55  
56  
57  
58  
59  
60

### **Patient and Public Involvement**

No patients involved.

### **ETHICS AND DISSEMINATION**

As this will be a scoping review of previously published studies, no ethics approval is required. The study findings will be submitted to an appropriate peer-reviewed journal.

### **DISCUSSION**

This scoping review will fill an important gap in the literature, as there are no existing reviews that exclusively focusses on mapping the use of TTX in healthcare settings. The results of this study will inform researchers, healthcare educators, clinicians, and administrators on the various uses of TTX in healthcare and more specifically in which contexts they are being used. Moreover, it will be possible to observe if the available literature focuses primarily on a single level of Kirkpatrick's model of outcome or ignores a particular level of outcome. These findings will be used to help develop and implement future educational programs involving TTX, with the hope that enhanced training of healthcare professionals will ultimately lead to improvements in patient, care, safety and satisfaction.

A limitation of this review is the exclusion of articles published in languages other than English or French.

### **AUTHOR CONTRIBUTIONS**

All authors contributed to the conception of the protocol. AF wrote the protocol. AC, MAMC, MI, NS, JSCB, SC, VC and RF critically revised the draft for important intellectual content. All authors have approved the final version of this submitted manuscript and agree to be accountable for all aspects related to this work.

## ACKNOWLEDGEMENTS

This research will be carried out as part of the of the first author's Masters thesis, for which she received scholarships from the following: Centre de recherche sur les soins et les services de première ligne de l'Université Laval from Université Laval.

The authors would like to thank Ms. Daniela Ziegler for helping with the design of the research methodology and Percipient Research & Consulting for their assistance with language editing.

## DATA SHARING

No additional data available.

## COPYRIGHT

The Corresponding Author has the right to grant on behalf of all authors and does grant on behalf of all authors, a worldwide licence to the Publishers and its licensees in perpetuity, in all forms, formats and media (whether known now or created in the future), to i) publish, reproduce, distribute, display and store the Contribution, ii) translate the Contribution into other languages, create adaptations, reprints, include within collections and create summaries, extracts and/or, abstracts of the Contribution, iii) create any other derivative work(s) based on the Contribution, iv) to exploit all subsidiary rights in the Contribution, v) the inclusion of electronic links from the Contribution to third party material where-ever it may be located; and, vi) licence any third party to do any or all of the above.

## COMPETING INTERESTS

All authors declare no support from any organization for the submitted work, no financial relationships with any organizations that might have an interest in the submitted work in the previous three years, and no other relationships or activities that could appear to have influenced the submitted work.

## TRANSPARENCY DECLARATION

The lead author (the manuscript's guarantor) affirms that the manuscript is an honest, accurate, and transparent account of the study being reported, that no important aspects of the study have been omitted, and that any discrepancies from the study as planned (and, if relevant, registered) have been explained.

## FUNDING

This work was supported by a \$2500 grant for research in primary care from Chaire du Docteur Sadok Besrouer de l'Université de Montréal and a \$5000 grant for research in primary care from Centre de recherche sur les soins et les services de première ligne de l'Université Laval (CERSSPL-UL) and the Centre universitaire intégré de soins et de services de première ligne (CIUSSS) de la Capitale-Nationale.

**REFERENCES**

1. Lehmann R, Seitz A, Meyburg J et al. CAEP Pediatric in-hospital emergencies: real life experiences, previous training and the need for training among physicians and nurses. *BMC Research Note*. 2019;12:1-7.
2. Lutfiyya MN, Chang LF, McGrath C, Lipsky MS. The state of the science of interprofessional collaborative practice: A scoping review of the patient health-related outcomes based literature published between 2010 and 2018. *PLoS One*. 2019;14:1-18.
3. Baird J, Ashland M, Rosenbluth G. Interprofessional Teams: Current Trends and Future Directions. *Pediatric Clinics of North America*. 2019;66:739-50.
4. Gum LF, Sweet L, Greenhill J, Prideaux D. Exploring interprofessional education and collaborative practice in Australian rural health services. *Journal of Interprofessional Care*. 2019;1-11.
5. Goldman J, Kitto S, Reeves S. Examining the implementation of collaborative competencies in a critical care setting: Key challenges for enacting competency-based education. *Journal of Interprofessional Care*. 2017;32:407-15
6. Danielson J, Willgerodt M. Building a Theoretically Grounded Curricular Framework for Successful Interprofessional Education. *American Journal of Pharmaceutical Education*. 2018;82:1133-9.
7. Wong A, Ruppel H, Gang M, Ng G. "The Safety Dance": A Faculty Development Workshop Partnering IPE and Patient Safety Initiatives Using Simulation-Based Education. *MedEdPORTAL*. 2016;12:1-6.
8. Linskens EJ, Neu AE, Walz EJ, et al. Preparing for a foreign animal disease outbreak using a novel tabletop exercise. *Prehosp Disaster Med* 2018;33:640-6.
9. Chung S, Gardner AH, Schonfeld DJ, et al. Addressing children's needs in disasters: a regional pediatric tabletop exercise. *Disaster Med Public Health Prep* 2018;12(5):582-6.
10. Wexler B, Flamm A. Lessons learned from an active shooter full-scale functional exercise in a newly constructed emergency department. *Disaster Med Public Health Prep* 2017;11:522-5.

11. Savoia E, Biddinger PD, Fox P, Levin DE, Stone L, Stoto MA. Impact of tabletop exercises on participants' knowledge of and confidence in legal authorities for infectious disease emergencies. *Disaster Med Public Health Prep* 2009;3:104-10.
12. Evans C, Schwartz R. Using tabletop exercises as an innovative and practical teaching strategy in response to external disaster scenarios. *Nursing education perspectives* 2019;40:62-4.
13. Skryabina E, Reedy G, Amlôta R, Jaye P, Riley P. What is the value of health emergency preparedness exercises? A scoping review study. *Int J Disaster Risk Reduct* 2017;21:274-83.
14. Mackenzie C, Donohue J, Wasylina P, Cullum W, Hu P, Lam DM. How will military/civilian coordination work for reception of mass casualties from overseas? *Prehosp Disaster Med* 2009;24:380-8.
15. Gordon DL, Issenberg SB, Gordon MS, et al. Stroke training of prehospital providers: an example of simulation-enhanced blended learning and evaluation. *Medical Teacher* 2005;27:114-21.
16. Moller TP, Munter KH, Ostergaard D, Fuhrmann L. Exploring challenges and solutions in the preparation of surgical patients. *Danish Medical Journal* 2015;62:A5141.
17. Arksey H, O'Malley L. Scoping studies: towards a methodological framework. *Int J Soc Res Methodol* 2005;8:19-32.
18. Tricco AC, Lillie E, Zarin W, et al. PRISMA extension for scoping reviews (PRISMA-ScR): checklist and explanation. *Ann Intern Med* 2018;169:467-73.
19. Moher D, Liberati A, Tetzlaff J, et al. Preferred reporting items for systematic reviews and meta-analyses: the PRISMA statement. *BMJ* 2009;339:b2535.
20. WHO Simulation Exercise Manual. Geneva: World Health Organization; 2017. Licence: CC BY-NC-SA 3.0 IGO.
21. Bradt D, Abraham K, Franks R. A strategic plan for disaster medicine in Australasia. *Emergency medicine*. 2003;15:271-82.
22. Kirkpatrick DL, Kirkpatrick JD. Evaluating Training Programs, 3rd ed. San Francisco, CA: Berrett-Koehler Publishers, 2006.
23. Shen N, Sockalingam S, Abi Jaoude A, et al. Scoping review protocol: education initiatives for medical psychiatry collaborative care. *BMJ Open* 2017;7:e015886.

- 1  
2  
3 24. Hawker S, Payne S, Kerr C, Hardey M, Powell J. Appraising the evidence: reviewing  
4 disparate data systematically. *Qual Health Res* 2002;12:1284-99.  
5  
6 25. Aromataris E, Munn Z. Joanna Briggs Institute Reviewer's Manual. The Joanna Briggs  
7 Institute. 2017. Available from <https://reviewersmanual.joannabriggs.org/>  
8  
9  
10  
11  
12  
13  
14  
15  
16  
17  
18  
19  
20  
21  
22  
23  
24  
25  
26  
27  
28  
29  
30  
31  
32  
33  
34  
35  
36  
37  
38  
39  
40  
41  
42  
43  
44  
45  
46  
47  
48  
49  
50  
51  
52  
53  
54  
55  
56  
57  
58  
59  
60

For peer review only



## Preferred Reporting Items for Systematic reviews and Meta-Analyses extension for Scoping Reviews (PRISMA-ScR) Checklist

| SECTION                           | ITEM | PRISMA-ScR CHECKLIST ITEM                                                                                                                                                                                                                                                 | REPORTED ON PAGE #                                              |
|-----------------------------------|------|---------------------------------------------------------------------------------------------------------------------------------------------------------------------------------------------------------------------------------------------------------------------------|-----------------------------------------------------------------|
| <b>TITLE</b>                      |      |                                                                                                                                                                                                                                                                           |                                                                 |
| Title                             | 1    | Identify the report as a scoping review.                                                                                                                                                                                                                                  | 1                                                               |
| <b>ABSTRACT</b>                   |      |                                                                                                                                                                                                                                                                           |                                                                 |
| Structured summary                | 2    | Provide a structured summary that includes (as applicable): background, objectives, eligibility criteria, sources of evidence, charting methods, results, and conclusions that relate to the review questions and objectives.                                             | 3                                                               |
| <b>INTRODUCTION</b>               |      |                                                                                                                                                                                                                                                                           |                                                                 |
| Rationale                         | 3    | Describe the rationale for the review in the context of what is already known. Explain why the review questions/objectives lend themselves to a scoping review approach.                                                                                                  | 5                                                               |
| Objectives                        | 4    | Provide an explicit statement of the questions and objectives being addressed with reference to their key elements (e.g., population or participants, concepts, and context) or other relevant key elements used to conceptualize the review questions and/or objectives. | 5                                                               |
| <b>METHODS</b>                    |      |                                                                                                                                                                                                                                                                           |                                                                 |
| Protocol and registration         | 5    | Indicate whether a review protocol exists; state if and where it can be accessed (e.g., a Web address); and if available, provide registration information, including the registration number.                                                                            | n/a                                                             |
| Eligibility criteria              | 6    | Specify characteristics of the sources of evidence used as eligibility criteria (e.g., years considered, language, and publication status), and provide a rationale.                                                                                                      | 8-9                                                             |
| Information sources*              | 7    | Describe all information sources in the search (e.g., databases with dates of coverage and contact with authors to identify additional sources), as well as the date the most recent search was executed.                                                                 | 8                                                               |
| Search                            | 8    | Present the full electronic search strategy for at least 1 database, including any limits used, such that it could be repeated.                                                                                                                                           | n/a<br>Reviewer 3 asked for removal of Supplementary Material I |
| Selection of sources of evidence† | 9    | State the process for selecting sources of evidence (i.e., screening and eligibility) included in the scoping review.                                                                                                                                                     | 9                                                               |

| SECTION                                               | ITEM | PRISMA-ScR CHECKLIST ITEM                                                                                                                                                                                                                                                                                  | REPORTED ON PAGE # |
|-------------------------------------------------------|------|------------------------------------------------------------------------------------------------------------------------------------------------------------------------------------------------------------------------------------------------------------------------------------------------------------|--------------------|
| Data charting process‡                                | 10   | Describe the methods of charting data from the included sources of evidence (e.g., calibrated forms or forms that have been tested by the team before their use, and whether data charting was done independently or in duplicate) and any processes for obtaining and confirming data from investigators. | 10                 |
| Data items                                            | 11   | List and define all variables for which data were sought and any assumptions and simplifications made.                                                                                                                                                                                                     | 10                 |
| Critical appraisal of individual sources of evidence§ | 12   | If done, provide a rationale for conducting a critical appraisal of included sources of evidence; describe the methods used and how this information was used in any data synthesis (if appropriate).                                                                                                      | 11                 |
| Synthesis of results                                  | 13   | Describe the methods of handling and summarizing the data that were charted.                                                                                                                                                                                                                               | 11                 |
| <b>RESULTS</b>                                        |      |                                                                                                                                                                                                                                                                                                            |                    |
| Selection of sources of evidence                      | 14   | Give numbers of sources of evidence screened, assessed for eligibility, and included in the review, with reasons for exclusions at each stage, ideally using a flow diagram.                                                                                                                               | n/a                |
| Characteristics of sources of evidence                | 15   | For each source of evidence, present characteristics for which data were charted and provide the citations.                                                                                                                                                                                                | n/a                |
| Critical appraisal within sources of evidence         | 16   | If done, present data on critical appraisal of included sources of evidence (see item 12).                                                                                                                                                                                                                 | n/a                |
| Results of individual sources of evidence             | 17   | For each included source of evidence, present the relevant data that were charted that relate to the review questions and objectives.                                                                                                                                                                      | n/a                |
| Synthesis of results                                  | 18   | Summarize and/or present the charting results as they relate to the review questions and objectives.                                                                                                                                                                                                       | n/a                |
| <b>DISCUSSION</b>                                     |      |                                                                                                                                                                                                                                                                                                            |                    |
| Summary of evidence                                   | 19   | Summarize the main results (including an overview of concepts, themes, and types of evidence available), link to the review questions and objectives, and consider the relevance to key groups.                                                                                                            | 12                 |
| Limitations                                           | 20   | Discuss the limitations of the scoping review process.                                                                                                                                                                                                                                                     | n/a                |
| Conclusions                                           | 21   | Provide a general interpretation of the results with respect to the review questions and objectives, as well as potential implications and/or next steps.                                                                                                                                                  | n/a                |

| SECTION        | ITEM | PRISMA-ScR CHECKLIST ITEM                                                                                                                                                       | REPORTED ON PAGE # |
|----------------|------|---------------------------------------------------------------------------------------------------------------------------------------------------------------------------------|--------------------|
| <b>FUNDING</b> |      |                                                                                                                                                                                 |                    |
| Funding        | 22   | Describe sources of funding for the included sources of evidence, as well as sources of funding for the scoping review. Describe the role of the funders of the scoping review. | 14                 |

JBI = Joanna Briggs Institute; PRISMA-ScR = Preferred Reporting Items for Systematic reviews and Meta-Analyses extension for Scoping Reviews.

\* Where *sources of evidence* (see second footnote) are compiled from, such as bibliographic databases, social media platforms, and Web sites.

† A more inclusive/heterogeneous term used to account for the different types of evidence or data sources (e.g., quantitative and/or qualitative research, expert opinion, and policy documents) that may be eligible in a scoping review as opposed to only studies. This is not to be confused with *information sources* (see first footnote).

‡ The frameworks by Arksey and O'Malley (6) and Levac and colleagues (7) and the JBI guidance (4, 5) refer to the process of data extraction in a scoping review as data charting.

§ The process of systematically examining research evidence to assess its validity, results, and relevance before using it to inform a decision. This term is used for items 12 and 19 instead of "risk of bias" (which is more applicable to systematic reviews of interventions) to include and acknowledge the various sources of evidence that may be used in a scoping review (e.g., quantitative and/or qualitative research, expert opinion, and policy document).

From: Tricco AC, Lillie E, Zarin W, O'Brien KK, Colquhoun H, Levac D, et al. PRISMA Extension for Scoping Reviews (PRISMA-ScR): Checklist and Explanation. *Ann Intern Med.* ;169:467–473. doi: 10.7326/M18-0850
